# Supplementary material for: Physical activity as a protective factor for dementia and Alzheimer’s disease: systematic review, meta-analysis and quality assessment of cohort and case–control studies
Source: PubMed Central journal article supplement (PMC9163715; doi:10.1136/bjsports-2021-104981), 2022-03-17
Supplement: bjsports-2021-104981supp003.pdf [file bjsports-2021-104981supp003.pdf]

# Supplementary Material Part 3

## Dose-response meta-analyses

### Contents

|                                                                         |    |
|-------------------------------------------------------------------------|----|
| Method description.....                                                 | 1  |
| Results - All-cause dementia (A-CD).....                                | 2  |
| Linear model including all studies (A-CD).....                          | 2  |
| Models including studies with 3 or more PA exposure levels (A-CD) ..... | 4  |
| Results - Alzheimer’s disease (AD).....                                 | 7  |
| Linear model including all studies (AD) .....                           | 7  |
| Models including studies with 3 or more PA exposure levels (AD).....    | 9  |
| Results - Vascular dementia (VD) .....                                  | 13 |
| Linear model including all studies (VD) .....                           | 13 |
| Models including studies with 3 or more PA exposure levels (VD).....    | 15 |
| References.....                                                         | 19 |

### Method description

#### Calculation of PA exposure levels

Following the procedure of Blond et al (1), we used the midpoint of the physical activity range (mean or median) from each group as the value for PA exposure. MET values for listed activities were taken from the included articles, or estimated using MET values of 3.5 for walking, 4.5 for moderate physical activity and 8.0 for sports participation or vigorous PA. For studies in which PA was assessed as bouts per week, one bout was estimated to be 30 minutes in duration unless otherwise specified in the included article. When physical activity levels were specified in calories per week, mean body weights reported in the articles were used for calculating MET-minutes using the formula

$$MET * minutes = \frac{60 * kcal}{kg}$$

Where mean body weight was not reported in an article, continental body weight averages were used in the calculation (2). In studies where it was not possible to directly calculate MET\*minutes per week for each group, we imputed PA exposure values using the means from other similar studies. We used a cutoff of a maximum of 21 hours of moderate PA per week (3 hours X 7 days), and this corresponds to a maximum value of 5040 MET-minutes per week.

#### Dose-response meta-analyses

Dose-response meta-analyses were performed using the dosresmeta package (3) in R and visualizations were created using the shiny webapp based on this package (4). Two-stage random effects meta-analyses using the restricted maximum likelihood procedure were used to pool RRs. Among studies with at least 3 different PA exposure levels, dose–response meta-analyses explored linear, quadratic and restricted cubic spline trends within the data. Knots in the restricted cubic spline regression models were set at the 20<sup>th</sup> and 80<sup>th</sup> percentiles of the overall PA exposure distribution. As it was not possible to explore quadratic or spline trends among studies with only two different PA exposure levels, we only examined linear trends

within this larger dataset that included all studies with at least two discrete PA exposure groups. We chose 200 MET min/week as the reference for the dose–response analyses as this was roughly equivalent to the mean MET\*min per week value of reference groups in the included studies. Post-estimations based on the dose–response model were conducted to predict RRs and 95% CIs at specific MET\*min per week values (approximately 200, 900, 2000, 3000, 4000, and 5000).

## Results - All-cause dementia (A-CD)

### Linear model including all studies (A-CD)

#### Scatter plot of RRs vs original exposure variable

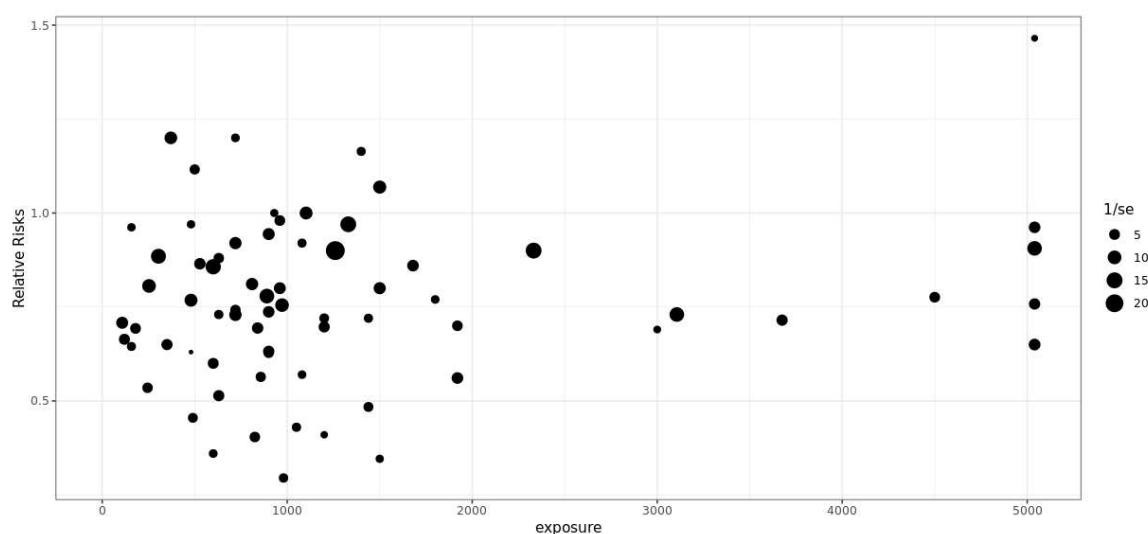

#### Linear Trend

```
Call: dosresmeta(formula = logrr ~ exposure, id = id, type = type,
  cases = cases, n = n, data = dataset(), se = se, covariance = input$pscorr)
```

Two-stage random-effects meta-analysis

Estimation method: REML

Covariance approximation: Greenland & Longnecker

Chi2 model:  $X^2 = 34.6275$  (df = 1), p-value = 0.0000

Fixed-effects coefficients

|             | Estimate | Std. Error | z       | Pr(> z ) | 95%ci.lb | 95%ci.ub |     |
|-------------|----------|------------|---------|----------|----------|----------|-----|
| (Intercept) | -0.0002  | 0.0000     | -5.8845 | 0.0000   | -0.0003  | -0.0001  | *** |

---

Signif. codes: 0 '\*\*\*' 0.001 '\*\*' 0.01 '\*' 0.05 '.' 0.1 ' ' 1

Between-study random-effects (co)variance components

Std. Dev

0.0002

Univariate Cochran Q-test for residual heterogeneity:

Q = 123.3919 (df = 42), p-value = 0.0000

I-square statistic = 66.0%

43 studies, 43 values, 1 fixed and 1 random-effects parameters

| logLik   | AIC       | BIC       |
|----------|-----------|-----------|
| 276.7986 | -549.5973 | -546.1220 |

**Graphical prediction**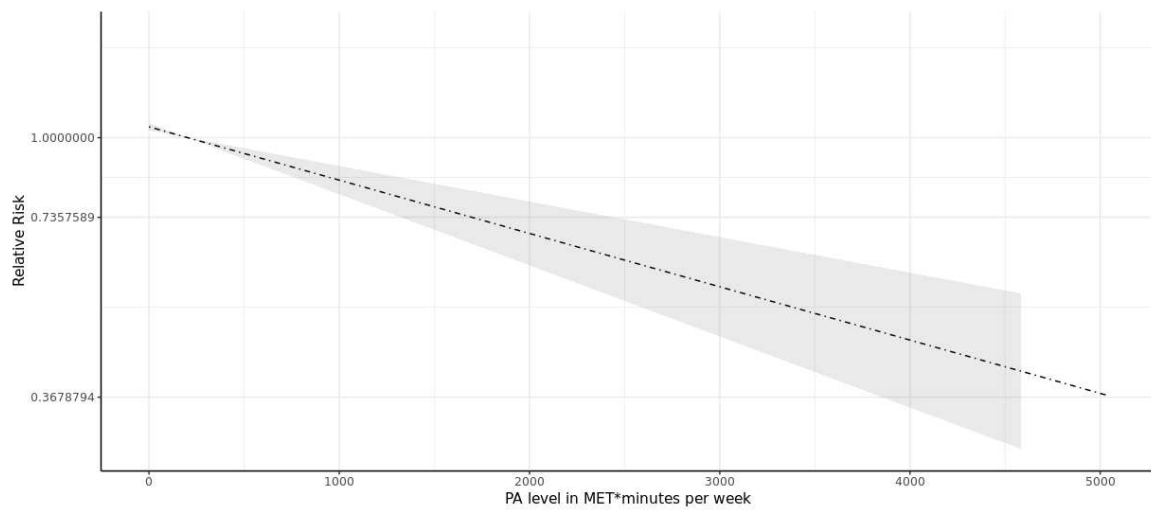**Analytical predictions**

| PA exposure | pred.lin | ci.lb.lin | ci.ub.lin |
|-------------|----------|-----------|-----------|
| 203.64      | 1.00     | 1.00      | 1.00      |
| 916.36      | 0.86     | 0.82      | 0.91      |
| 1934.55     | 0.70     | 0.62      | 0.79      |
| 2952.73     | 0.57     | 0.47      | 0.69      |
| 3970.91     | 0.46     | 0.36      | 0.60      |
| 4989.09     | 0.37     | 0.27      | 0.52      |

## Models including studies with 3 or more PA exposure levels (A-CD)

## Scatter plot of RRs vs original exposure variable

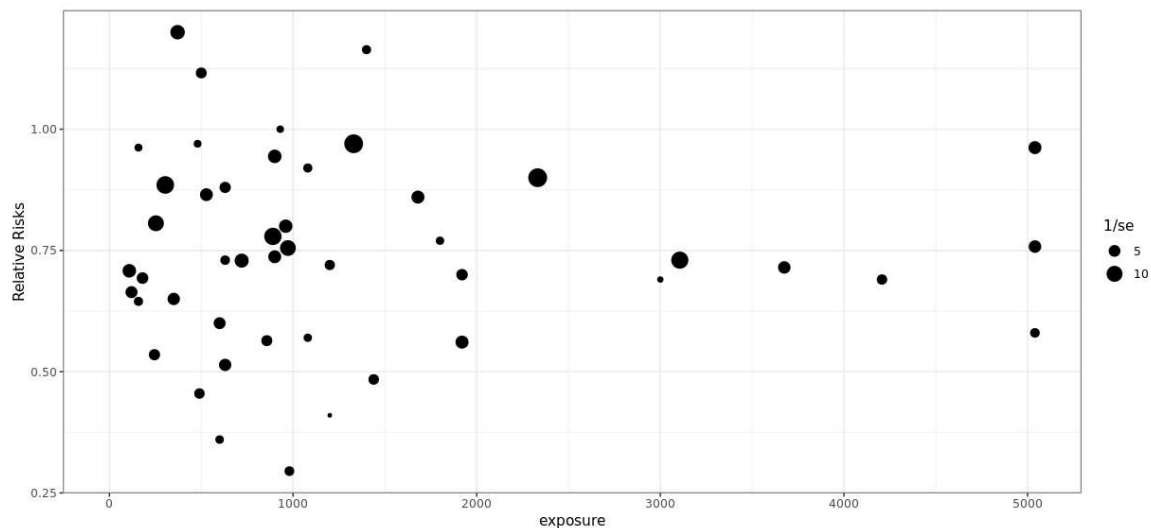

## Linear Trend

```
Call: dosresmeta(formula = logrr ~ exposure, id = id, type = type,
  cases = cases, n = n, data = dataset(), se = se, covariance = input$pscorr)
```

Two-stage random-effects meta-analysis

Estimation method: REML

Covariance approximation: Greenland & Longnecker

Chi2 model:  $X^2 = 21.4096$  (df = 1), p-value = 0.0000

Fixed-effects coefficients

|             | Estimate | Std. Error | z       | Pr(> z ) | 95%ci.lb | 95%ci.ub    |
|-------------|----------|------------|---------|----------|----------|-------------|
| (Intercept) | -0.0002  | 0.0000     | -4.6270 | 0.0000   | -0.0003  | -0.0001 *** |

---

Signif. codes: 0 '\*\*\*' 0.001 '\*\*' 0.01 '\*' 0.05 '.' 0.1 ' ' 1

Between-study random-effects (co)variance components

Std. Dev

0.0001

Univariate Cochran Q-test for residual heterogeneity:

$Q = 57.7815$  (df = 19), p-value = 0.0000

I-square statistic = 67.1%

20 studies, 20 values, 1 fixed and 1 random-effects parameters

| logLik   | AIC       | BIC       |
|----------|-----------|-----------|
| 128.2688 | -252.5375 | -250.6487 |

### Spline model

Call: dosresmeta(formula = logrr ~ rcs(exposure, knots), id = id, type = type, cases = cases, n = n, data = dataset(), se = se, covariance = input\$pscorr)

Two-stage random-effects meta-analysis

Estimation method: REML

Covariance approximation: Greenland & Longnecker

Chi2 model: X2 = 37.6403 (df = 2), p-value = 0.0000

Fixed-effects coefficients

|                                           | Estimate | Std. Error | z        |     |
|-------------------------------------------|----------|------------|----------|-----|
| rcs(exposure, knots)exposure.(Intercept)  | -0.0005  | 0.0001     | -5.5896  |     |
| rcs(exposure, knots)exposure'.(Intercept) | 0.0004   | 0.0001     | 4.5834   |     |
|                                           | Pr(> z ) | 95%ci.lb   | 95%ci.ub |     |
| rcs(exposure, knots)exposure.(Intercept)  | 0.0000   | -0.0006    | -0.0003  | *** |
| rcs(exposure, knots)exposure'.(Intercept) | 0.0000   | 0.0002     | 0.0006   | *** |

---

Signif. codes: 0 '\*\*\*' 0.001 '\*\*' 0.01 '\*' 0.05 '.' 0.1 ' ' 1

Between-study random-effects (co)variance components

|                               | Std. Dev | Corr                         |
|-------------------------------|----------|------------------------------|
| rcs(exposure, knots)exposure  | 0.0002   | rcs(exposure, knots)exposure |
| rcs(exposure, knots)exposure' | 0.0001   | -1                           |

Univariate Cochran Q-test for residual heterogeneity:

Q = 58.7637 (df = 38), p-value = 0.0169

I-square statistic = 35.3%

20 studies, 40 values, 2 fixed and 3 random-effects parameters

| logLik   | AIC       | BIC       |
|----------|-----------|-----------|
| 222.9501 | -435.9001 | -427.7122 |

### Quadratic trend

```

Call: dosresmeta(formula = logrr ~ exposure + I(exposure^2), id = id,
  type = type, cases = cases, n = n, data = dataset(), se = se,
  covariance = input$pscorr)

Two-stage random-effects meta-analysis
Estimation method: REML
Covariance approximation: Greenland & Longnecker

Chi2 model: X2 = 38.9658 (df = 2), p-value = 0.0000

Fixed-effects coefficients

```

|                           | Estimate | Std. Error | z       | Pr(> z ) | 95%ci.lb |
|---------------------------|----------|------------|---------|----------|----------|
| exposure.(Intercept)      | -0.0004  | 0.0001     | -4.6303 | 0.0000   | -0.0005  |
| I(exposure^2).(Intercept) | 0.0000   | 0.0000     | 3.3398  | 0.0008   | 0.0000   |
|                           | 95%ci.ub |            |         |          |          |
| exposure.(Intercept)      | -0.0002  | ***        |         |          |          |
| I(exposure^2).(Intercept) | 0.0000   | ***        |         |          |          |

```

---
Signif. codes:  0 '***' 0.001 '**' 0.01 '*' 0.05 '.' 0.1 ' ' 1

Between-study random-effects (co)variance components

```

|               | Std. Dev | Corr     |
|---------------|----------|----------|
| exposure      | 0.0002   | exposure |
| I(exposure^2) | 0.0000   | -1       |

```

Univariate Cochran Q-test for residual heterogeneity:
Q = 66.0653 (df = 38), p-value = 0.0032
I-square statistic = 42.5%

20 studies, 40 values, 2 fixed and 3 random-effects parameters

```

| logLik   | AIC       | BIC       |
|----------|-----------|-----------|
| 382.8104 | -755.6209 | -747.4329 |

## Graphical prediction

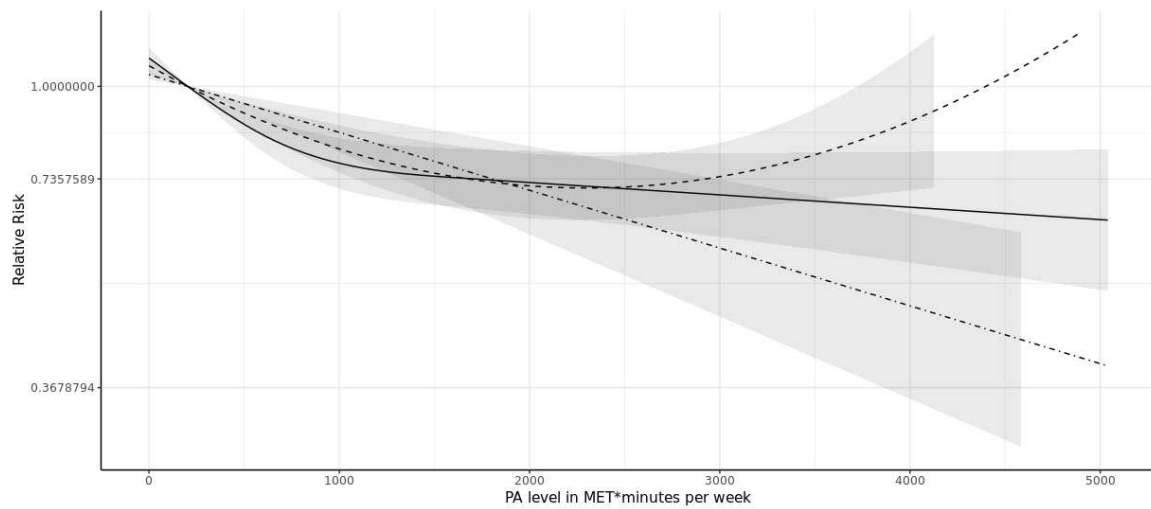

Linear Trend (dot-dash); Spline Model with knots at 20 and 80% of distribution (solid); Quadratic Trend (dashed)

## Analytical predictions

| exposure | pred.lin | ci.lb.lin | ci.ub.lin | pred.spl | ci.lb.spl | ci.ub.spl | pred.quadr | ci.lb.quadr | ci.ub.quadr |
|----------|----------|-----------|-----------|----------|-----------|-----------|------------|-------------|-------------|
| 203.64   | 1.00     | 1.00      | 1.00      | 1.00     | 1.00      | 1.00      | 1.00       | 1.00        | 1.00        |
| 916.36   | 0.87     | 0.82      | 0.92      | 0.79     | 0.73      | 0.85      | 0.83       | 0.77        | 0.89        |
| 1934.55  | 0.72     | 0.62      | 0.83      | 0.73     | 0.66      | 0.81      | 0.72       | 0.65        | 0.80        |
| 2952.73  | 0.59     | 0.47      | 0.74      | 0.70     | 0.61      | 0.80      | 0.74       | 0.66        | 0.82        |
| 3970.91  | 0.49     | 0.36      | 0.66      | 0.67     | 0.56      | 0.80      | 0.88       | 0.71        | 1.11        |
| 4989.09  | 0.40     | 0.27      | 0.59      | 0.64     | 0.51      | 0.81      | 1.24       | 0.78        | 1.99        |

## Results - Alzheimer's disease (AD)

Linear model including all studies (AD)

Scatter plot of RRs vs original exposure variable

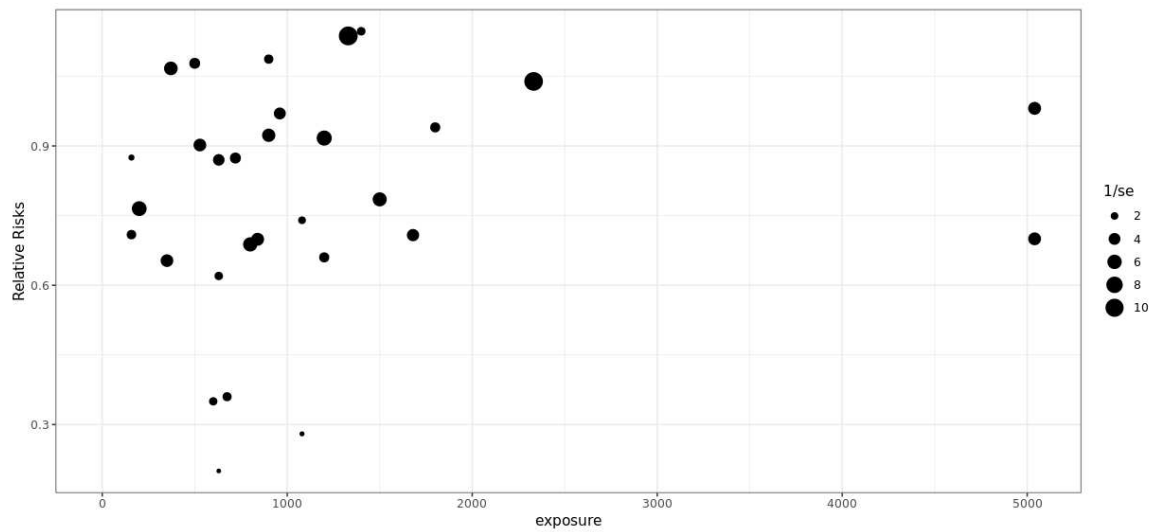

### Linear Trend

```
Call: dosresmeta(formula = logrr ~ exposure, id = id, type = type,
  cases = cases, n = n, data = dataset(), se = se, covariance = input$pscorr)
```

Two-stage random-effects meta-analysis

Estimation method: REML

Covariance approximation: Greenland & Longnecker

Chi2 model:  $X^2 = 5.8708$  (df = 1), p-value = 0.0154

Fixed-effects coefficients

|             | Estimate | Std. Error | z       | Pr(> z ) | 95%ci.lb | 95%ci.ub  |
|-------------|----------|------------|---------|----------|----------|-----------|
| (Intercept) | -0.0001  | 0.0000     | -2.4230 | 0.0154   | -0.0002  | -0.0000 * |

---

Signif. codes: 0 '\*\*\*' 0.001 '\*\*' 0.01 '\*' 0.05 '.' 0.1 ' ' 1

Between-study random-effects (co)variance components

Std. Dev

0.0001

Univariate Cochran Q-test for residual heterogeneity:

Q = 28.3221 (df = 18), p-value = 0.0573

I-square statistic = 36.4%

19 studies, 19 values, 1 fixed and 1 random-effects parameters

| logLik | AIC | BIC |
|--------|-----|-----|
|--------|-----|-----|



118.7244 -233.4489 -231.6681

**Graphical prediction**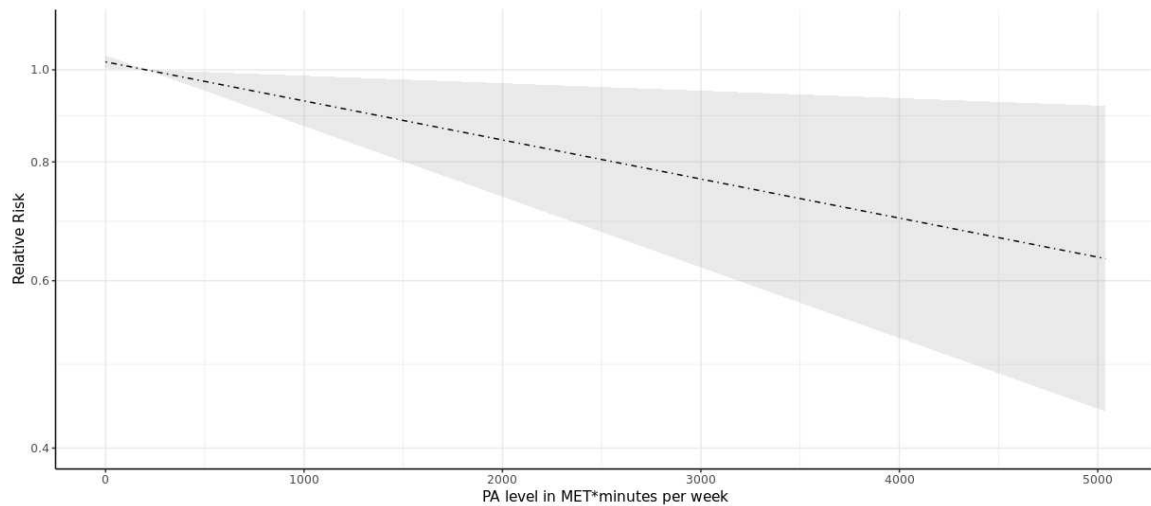**Analytical predictions**

| PA exposure | pred.lin | ci.lb.lin | ci.ub.lin |
|-------------|----------|-----------|-----------|
| 203.64      | 1.00     | 1.00      | 1.00      |
| 916.36      | 0.93     | 0.89      | 0.99      |
| 1934.55     | 0.85     | 0.74      | 0.97      |
| 2952.73     | 0.77     | 0.62      | 0.95      |
| 3970.91     | 0.70     | 0.52      | 0.93      |
| 4989.09     | 0.64     | 0.44      | 0.92      |

Models including studies with 3 or more PA exposure levels (AD)

**Scatter plot of RRs vs original exposure variable**

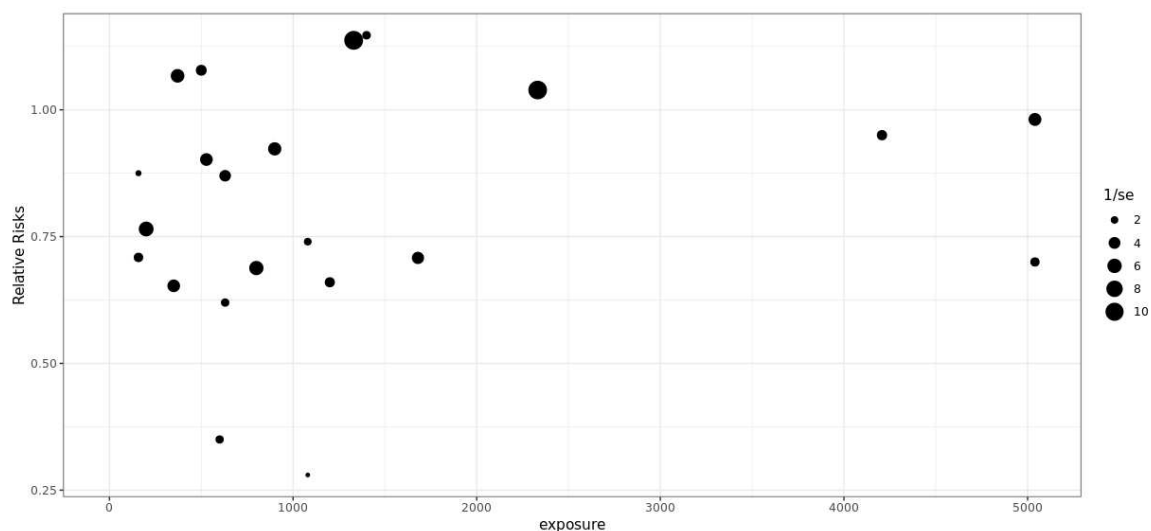

### Linear Trend

```
Call: dosresmeta(formula = logrr ~ exposure, id = id, type = type,
  cases = cases, n = n, data = dataset(), se = se, covariance = input$pscorr)
```

Two-stage random-effects meta-analysis

Estimation method: REML

Covariance approximation: Greenland & Longnecker

Chi2 model:  $X^2 = 2.1500$  (df = 1), p-value = 0.1426

Fixed-effects coefficients

|             | Estimate | Std. Error | z       | Pr(> z ) | 95%ci.lb | 95%ci.ub |
|-------------|----------|------------|---------|----------|----------|----------|
| (Intercept) | -0.0001  | 0.0001     | -1.4663 | 0.1426   | -0.0002  | 0.0000   |

---

Signif. codes: 0 '\*\*\*' 0.001 '\*\*' 0.01 '\*' 0.05 '.' 0.1 ' ' 1

Between-study random-effects (co)variance components

Std. Dev

0.0001

Univariate Cochran Q-test for residual heterogeneity:

Q = 10.8651 (df = 8), p-value = 0.2095

I-square statistic = 26.4%

9 studies, 9 values, 1 fixed and 1 random-effects parameters

| logLik | AIC | BIC |
|--------|-----|-----|
|--------|-----|-----|

55.4683 -106.9365 -106.7776

### Spline model

Call: dosresmeta(formula = logrr ~ rcs(exposure, knots), id = id, type = type, cases = cases, n = n, data = dataset(), se = se, covariance = input\$pscorr)

Two-stage random-effects meta-analysis

Estimation method: REML

Covariance approximation: Greenland & Longnecker

Chi2 model: X2 = 6.2649 (df = 2), p-value = 0.0436

Fixed-effects coefficients

|                                           | Estimate | Std. Error | z        |   |
|-------------------------------------------|----------|------------|----------|---|
| rcs(exposure, knots)exposure.(Intercept)  | -0.0004  | 0.0001     | -2.4593  |   |
| rcs(exposure, knots)exposure'.(Intercept) | 0.0003   | 0.0001     | 2.3245   |   |
|                                           | Pr(> z ) | 95%ci.lb   | 95%ci.ub |   |
| rcs(exposure, knots)exposure.(Intercept)  | 0.0139   | -0.0007    | -0.0001  | * |
| rcs(exposure, knots)exposure'.(Intercept) | 0.0201   | 0.0001     | 0.0006   | * |

---

Signif. codes: 0 '\*\*\*' 0.001 '\*\*' 0.01 '\*' 0.05 '.' 0.1 ' ' 1

Between-study random-effects (co)variance components

|                               | Std. Dev | Corr                         |
|-------------------------------|----------|------------------------------|
| rcs(exposure, knots)exposure  | 0.0000   | rcs(exposure, knots)exposure |
| rcs(exposure, knots)exposure' | 0.0000   | 0.9723                       |

Univariate Cochran Q-test for residual heterogeneity:

Q = 16.9974 (df = 16), p-value = 0.3858

I-square statistic = 5.9%

9 studies, 18 values, 2 fixed and 3 random-effects parameters

| logLik  | AIC       | BIC       |
|---------|-----------|-----------|
| 85.2275 | -160.4549 | -156.5920 |

### Quadratic trend

Call: dosresmeta(formula = logrr ~ exposure + I(exposure^2), id = id, type = type, cases = cases, n = n, data = dataset(), se = se,

```

covariance = input$pscorr)

Two-stage random-effects meta-analysis
Estimation method: REML
Covariance approximation: Greenland & Longnecker

Chi2 model: X2 = 2.8700 (df = 2), p-value = 0.2381

Fixed-effects coefficients

```

|                           | Estimate | Std. Error | z       | Pr(> z ) | 95%ci.lb |
|---------------------------|----------|------------|---------|----------|----------|
| exposure.(Intercept)      | -0.0002  | 0.0001     | -1.6085 | 0.1077   | -0.0004  |
| I(exposure^2).(Intercept) | 0.0000   | 0.0000     | 1.3787  | 0.1680   | -0.0000  |
|                           | 95%ci.ub |            |         |          |          |
| exposure.(Intercept)      | 0.0000   |            |         |          |          |
| I(exposure^2).(Intercept) | 0.0000   |            |         |          |          |

```

---
Signif. codes:  0 '***' 0.001 '**' 0.01 '*' 0.05 '.' 0.1 ' ' 1

Between-study random-effects (co)variance components

```

|               | Std. Dev | Corr     |
|---------------|----------|----------|
| exposure      | 0.0002   | exposure |
| I(exposure^2) | 0.0000   | -1       |

```

Univariate Cochran Q-test for residual heterogeneity:
Q = 19.6762 (df = 16), p-value = 0.2352
I-square statistic = 18.7%

9 studies, 18 values, 2 fixed and 3 random-effects parameters

```

| logLik   | AIC       | BIC       |
|----------|-----------|-----------|
| 158.5896 | -307.1793 | -303.3163 |

## Graphical prediction

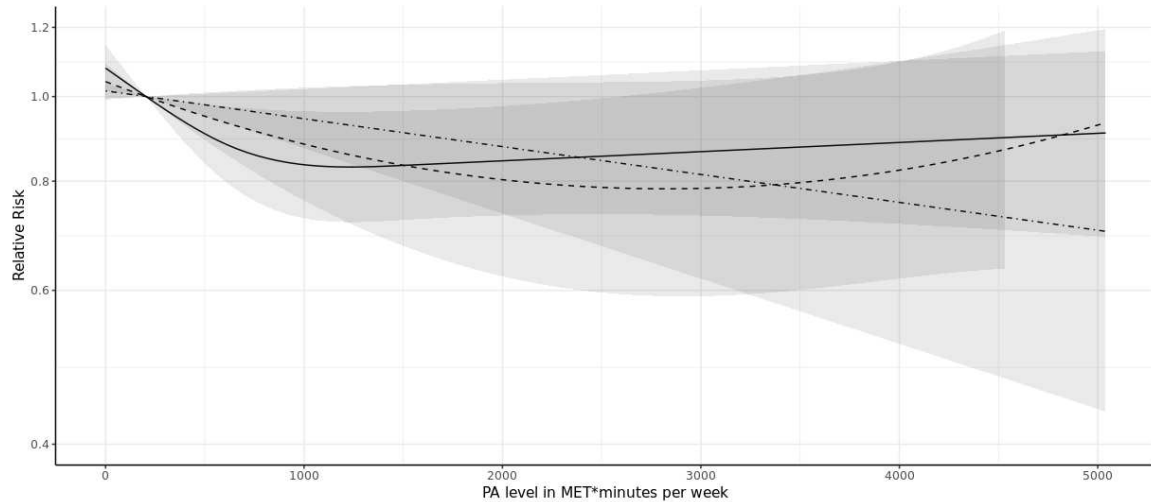

Linear Trend (dot-dash); Spline Model with knots at 20 and 80% of distribution (solid); Quadratic Trend (dashed)

## Analytical predictions

| PA exposure | pred.lin | ci.lb.lin | ci.ub.lin | pred.spl | ci.lb.spl | ci.ub.spl | pred.quadr | ci.lb.quadr | ci.ub.quadr |
|-------------|----------|-----------|-----------|----------|-----------|-----------|------------|-------------|-------------|
| 203.64      | 1.00     | 1.00      | 1.00      | 1.00     | 1.00      | 1.00      | 1.00       | 1.00        | 1.00        |
| 916.36      | 0.95     | 0.88      | 1.02      | 0.84     | 0.73      | 0.96      | 0.89       | 0.78        | 1.02        |
| 1934.55     | 0.88     | 0.74      | 1.04      | 0.84     | 0.73      | 0.97      | 0.81       | 0.63        | 1.04        |
| 2952.73     | 0.82     | 0.62      | 1.07      | 0.86     | 0.73      | 1.02      | 0.78       | 0.59        | 1.04        |
| 3970.91     | 0.76     | 0.52      | 1.10      | 0.89     | 0.72      | 1.10      | 0.82       | 0.62        | 1.09        |
| 4989.09     | 0.70     | 0.44      | 1.13      | 0.91     | 0.69      | 1.19      | 0.93       | 0.64        | 1.34        |

## Results - Vascular dementia (VD)

Linear model including all studies (VD)

Scatter plot of RRs vs original exposure variable

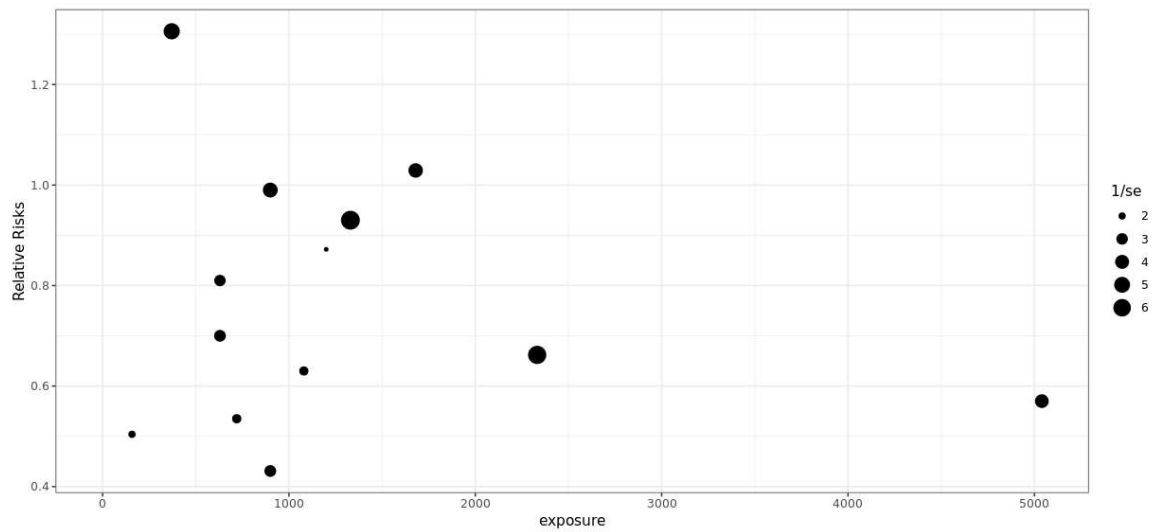

### Linear Trend

```
Call: dosresmeta(formula = logrr ~ exposure, id = id, type = type,
  cases = cases, n = n, data = dataset(), se = se, covariance = input$pscorr)
```

Two-stage random-effects meta-analysis

Estimation method: REML

Covariance approximation: Greenland & Longnecker

Chi2 model:  $X^2 = 14.3032$  (df = 1), p-value = 0.0002

Fixed-effects coefficients

|             | Estimate | Std. Error | z       | Pr(> z ) | 95%ci.lb | 95%ci.ub |     |
|-------------|----------|------------|---------|----------|----------|----------|-----|
| (Intercept) | -0.0002  | 0.0000     | -3.7820 | 0.0002   | -0.0003  | -0.0001  | *** |

---

Signif. codes: 0 '\*\*\*' 0.001 '\*\*' 0.01 '\*' 0.05 '.' 0.1 ' ' 1

Between-study random-effects (co)variance components

Std. Dev

0.0000

Univariate Cochran Q-test for residual heterogeneity:

Q = 8.2459 (df = 7), p-value = 0.3114

I-square statistic = 15.1%

8 studies, 8 values, 1 fixed and 1 random-effects parameters

| logLik | AIC | BIC |
|--------|-----|-----|
|--------|-----|-----|

45.5563 -87.1126 -87.2208

**Graphical prediction**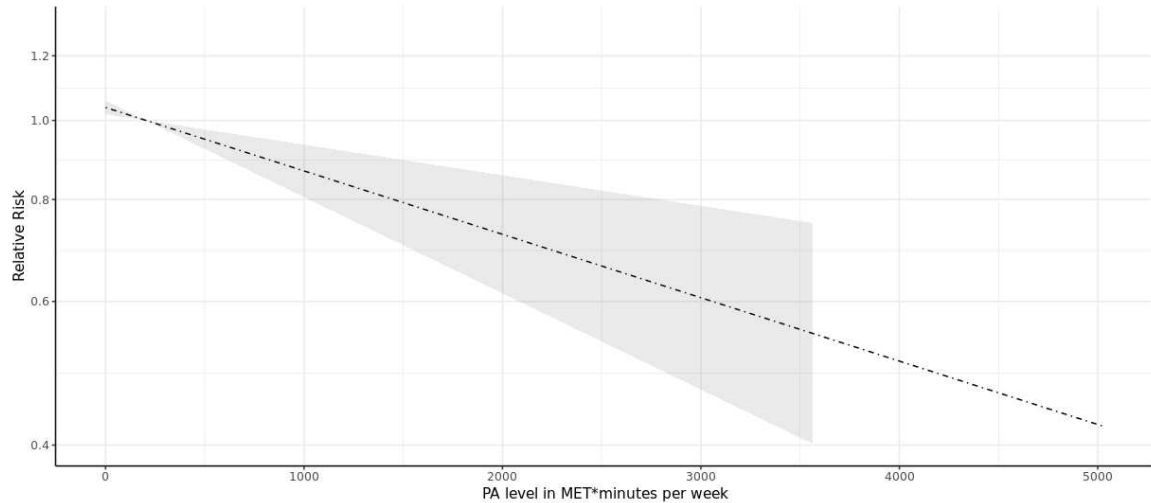**Analytical predictions**

| PA exposure | pred.lin | ci.lb.lin | ci.ub.lin |
|-------------|----------|-----------|-----------|
| 203.64      | 1.00     | 1.00      | 1.00      |
| 916.36      | 0.88     | 0.82      | 0.94      |
| 1934.55     | 0.73     | 0.62      | 0.86      |
| 2952.73     | 0.61     | 0.47      | 0.79      |
| 3970.91     | 0.51     | 0.36      | 0.72      |
| 4989.09     | 0.42     | 0.27      | 0.66      |

Models including studies with 3 or more PA exposure levels (VD)

**Scatter plot of RRs vs original exposure variable**

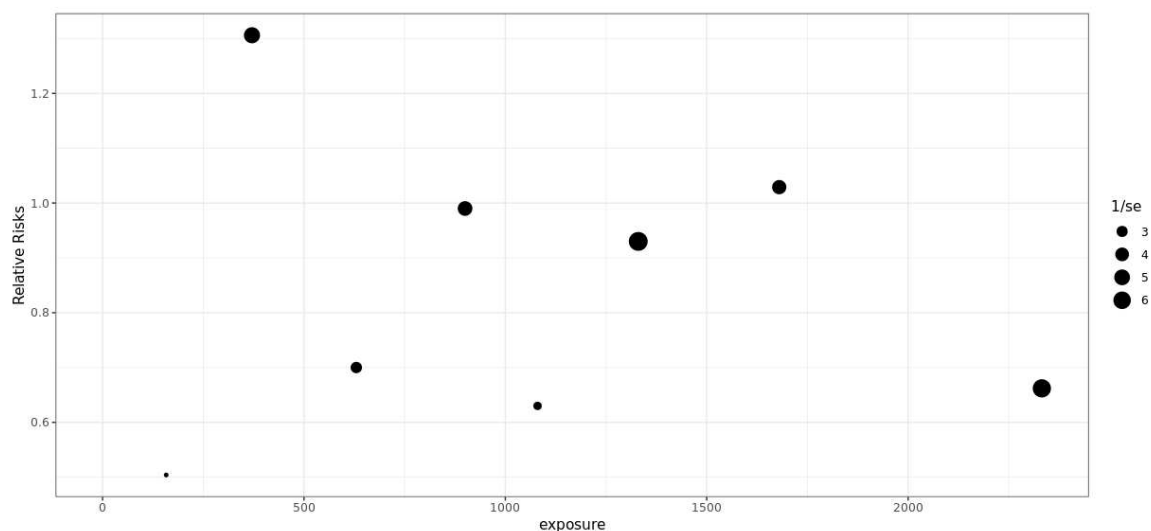

### Linear Trend

```
Call: dosresmeta(formula = logrr ~ exposure, id = id, type = type,
  cases = cases, n = n, data = dataset(), se = se, covariance = input$pscorr)
```

Two-stage random-effects meta-analysis

Estimation method: REML

Covariance approximation: Greenland & Longnecker

Chi2 model:  $X^2 = 7.8907$  (df = 1), p-value = 0.0050

Fixed-effects coefficients

|             | Estimate | Std. Error | z       | Pr(> z ) | 95%ci.lb | 95%ci.ub   |
|-------------|----------|------------|---------|----------|----------|------------|
| (Intercept) | -0.0002  | 0.0001     | -2.8090 | 0.0050   | -0.0004  | -0.0001 ** |

---

Signif. codes: 0 '\*\*\*' 0.001 '\*\*' 0.01 '\*' 0.05 '.' 0.1 ' ' 1

Between-study random-effects (co)variance components

Std. Dev

0.0000

Univariate Cochran Q-test for residual heterogeneity:

Q = 1.1021 (df = 2), p-value = 0.5764

I-square statistic = 0.0%

3 studies, 3 values, 1 fixed and 1 random-effects parameters

| logLik | AIC | BIC |
|--------|-----|-----|
|--------|-----|-----|



14.2687 -24.5373 -27.1510

### Spline model

Call: dosresmeta(formula = logrr ~ rcs(exposure, knots), id = id, type = type, cases = cases, n = n, data = dataset(), se = se, covariance = input\$pscorr)

Two-stage random-effects meta-analysis

Estimation method: REML

Covariance approximation: Greenland & Longnecker

Chi2 model: X2 = 8.1864 (df = 2), p-value = 0.0167

Fixed-effects coefficients

|                                           | Estimate | Std. Error | z        |
|-------------------------------------------|----------|------------|----------|
| rcs(exposure, knots)exposure.(Intercept)  | -0.0001  | 0.0003     | -0.1959  |
| rcs(exposure, knots)exposure'.(Intercept) | -0.0001  | 0.0003     | -0.5438  |
|                                           | Pr(> z ) | 95%ci.lb   | 95%ci.ub |
| rcs(exposure, knots)exposure.(Intercept)  | 0.8447   | -0.0006    | 0.0005   |
| rcs(exposure, knots)exposure'.(Intercept) | 0.5866   | -0.0007    | 0.0004   |

---

Signif. codes: 0 '\*\*\*' 0.001 '\*\*' 0.01 '\*' 0.05 '.' 0.1 ' ' 1

Between-study random-effects (co)variance components

|                               | Std. Dev | Corr                         |
|-------------------------------|----------|------------------------------|
| rcs(exposure, knots)exposure  | 0.0000   | rcs(exposure, knots)exposure |
| rcs(exposure, knots)exposure' | 0.0000   | -0.9995                      |

Univariate Cochran Q-test for residual heterogeneity:

Q = 1.5369 (df = 4), p-value = 0.8201

I-square statistic = 0.0%

3 studies, 6 values, 2 fixed and 3 random-effects parameters

| logLik  | AIC      | BIC      |
|---------|----------|----------|
| 24.6521 | -39.3042 | -42.3727 |

### Quadratic trend

Call: dosresmeta(formula = logrr ~ exposure + I(exposure^2), id = id, type = type, cases = cases, n = n, data = dataset(), se = se,

```

covariance = input$pscorr)

Two-stage random-effects meta-analysis
Estimation method: REML
Covariance approximation: Greenland & Longnecker

Chi2 model: X2 = 8.5347 (df = 2), p-value = 0.0140

Fixed-effects coefficients

```

|                           | Estimate | Std. Error | z       | Pr(> z ) | 95%ci.lb |
|---------------------------|----------|------------|---------|----------|----------|
| exposure.(Intercept)      | -0.0000  | 0.0003     | -0.0541 | 0.9568   | -0.0005  |
| I(exposure^2).(Intercept) | -0.0000  | 0.0000     | -0.8025 | 0.4223   | -0.0000  |
|                           | 95%ci.ub |            |         |          |          |
| exposure.(Intercept)      | 0.0005   |            |         |          |          |
| I(exposure^2).(Intercept) | 0.0000   |            |         |          |          |

```

---
Signif. codes:  0 '***' 0.001 '**' 0.01 '*' 0.05 '.' 0.1 ' ' 1

Between-study random-effects (co)variance components

```

|               | Std. Dev | Corr     |
|---------------|----------|----------|
| exposure      | 0.0000   | exposure |
| I(exposure^2) | 0.0000   | 0.9446   |

```

Univariate Cochran Q-test for residual heterogeneity:
Q = 1.2812 (df = 4), p-value = 0.8646
I-square statistic = 0.0%

3 studies, 6 values, 2 fixed and 3 random-effects parameters

```

| logLik  | AIC      | BIC      |
|---------|----------|----------|
| 40.3790 | -70.7581 | -73.8266 |

## Graphical prediction

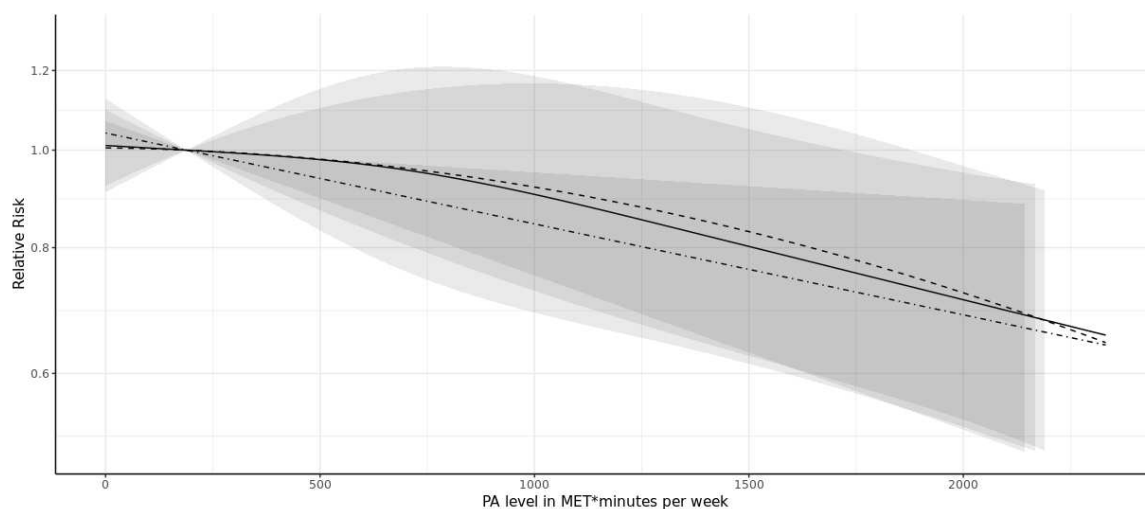

Linear Trend (dot-dash); Spline Model with knots at 20 and 80% of distribution (solid); Quadratic Trend (dashed)

## Analytical predictions

| PA exposure | pred.lin | ci.lb.lin | ci.ub.lin | pred.spl | ci.lb.spl | ci.ub.spl | pred.quadr | ci.lb.quadr | ci.ub.quadr |
|-------------|----------|-----------|-----------|----------|-----------|-----------|------------|-------------|-------------|
| 188.48      | 1.00     | 1.00      | 1.00      | 1.00     | 1.00      | 1.00      | 1.00       | 1.00        | 1.00        |
| 424.00      | 0.95     | 0.92      | 0.99      | 0.98     | 0.87      | 1.12      | 0.99       | 0.90        | 1.08        |
| 895.11      | 0.86     | 0.78      | 0.96      | 0.92     | 0.71      | 1.20      | 0.93       | 0.75        | 1.16        |
| 1366.22     | 0.78     | 0.66      | 0.93      | 0.83     | 0.63      | 1.08      | 0.86       | 0.65        | 1.13        |
| 1837.33     | 0.71     | 0.56      | 0.90      | 0.74     | 0.56      | 0.98      | 0.76       | 0.57        | 1.01        |
| 2308.44     | 0.64     | 0.47      | 0.88      | 0.66     | 0.48      | 0.91      | 0.65       | 0.48        | 0.88        |

## References

- Blond K, Brinkløv CF, Ried-Larsen M, Crippa A, Grøntved A. Association of high amounts of physical activity with mortality risk: a systematic review and meta-analysis. *Br J Sports Med*. 2020 Oct 1;54(20):1195–201.
- Walpole SC, Prieto-Merino D, Edwards P, Cleland J, Stevens G, Roberts I. The weight of nations: an estimation of adult human biomass. *BMC Public Health*. 2012 Jun 18;12(1):439.
- Crippa A, Orsini N. Multivariate Dose-Response Meta-Analysis: The dosresmeta R Package. *J Stat Softw*. 2016 Aug 16;72:1–15.
- Crippa A, Orsini N. Multivariate Dose-Response Meta-Analysis [Internet]. Multivariate Dose-Response Meta-Analysis. [cited 2021 Dec 22]. Available from: <http://alessiocrippa.com/shiny/dosresmeta/>
