# Supplementary material for: Physical activity as a protective factor for dementia and Alzheimer’s disease: systematic review, meta-analysis and quality assessment of cohort and case–control studies
Source: Br J Sports Med. 2022 Mar 17;56(12):701–9. doi: 10.1136/bjsports-2021-104981 (PMC9163715; doi:10.1136/bjsports-2021-104981)
Supplement: Supplementary data [file bjsports-2021-104981supp002.xlsx]

## Sheet: Dementia studies
Publication	Reference category	Baseline Physical activity group	Physical activity measurement type	Outcome type (OR= odds ratio, HR= hazard ratio, RR= relative risk)	Incidence rate of dementia	Exposure	Physical activity recommendation (1= does not meet, 2= meets, missing value = not applicable)	Highest group (1= highest physical activity group of the study, 0= not highest physical activity group of the study)	HR or OR	RR	Original Lower limit 95% (HR or RR)	RR lower limit (95%)	Original Upper limit 95% (HR or OR)	RR Upper Limit (95%)	Standard error (SE)	Sample size (category N + reference group N/number of comparisons to the reference group)	Country of origin	Publication year	Design	Age at baseline	Baseline age group (1=30-50 years, 2=50-65 years, 3=65-80 years, 4= 80+ years)	Only leisure PA (1= yes, 0=no)	Only work-related PA (1= yes, 0=no)	Both leisure and work-related PA (1= yes, 0=no)	Age used a covariate or included in the model or the cohort is a birth cohort (1= yes, 0=no)	Baseline cognition used as covariate (1= yes, 0= no)	Chronic disease used as a covariate (1= yes, 0=no)	Education used as a covariate or the cohort has the same education (1= yes, 0=no)	Gender used as a covariate (1= yes, 0=no)	Vascular risk factor used as a covariate (1=yes, 0=no)	Follow-up rate (1= ≥ 70%, 0= < 70% or not told)	Gender (0= men, 1= women, 3= men and women)	ApoE ε4 status used as a covariate (1= yes, 0=no)	Is gender interaction tested (0= no interaction, 1= yes interaction, 3= not told)	Participation rate (1= >70% or well designed case-control study or register study, 0= <70% or not told or volunteer recruit)	Separate results for genders (1=yes, 0=no)	Follow-up length (years)	Follow-up length group (1= < 5 years, 2= 5-20 years, 3= at least 20 years)	Total number of covariates	Twin study (1= yes, 0=no)	Quality (1= high, 2= moderate, 3= poor)	Objective measure of physical activity (1= yes, 0=no)	Funding	Funding group (0= funding sources not told, 1= purely non-commercial funding sources, 2= funding also from commercial sources)
Abellan van Kan 2012	< 1h of PA/wk	Low PA	Dichotomous	OR	0.224111	At least one physical activity for at least 1 hour a week	1	1	0.59	0.768	0.36	0.6	0.91	0.954	0.118299	647	France	2012	Prospective cohort study	at least 75 years (mean, standard deviation or range not told)	4	1	0	0	0	0	0	0	0	0	0	1	0	3	0	0	7	2	0	0	3	0	Not told	0
Andel 2008 (Light PA)	Self-report of "Hardly any PA"	None	Four categories	OR	0.0842374	Self-report of "walking or light gardening"	1	0	0.63	0.650267	0.43	0.451688	0.91	0.916952	0.180628	2348	Sweden	2008	Case-control study	48.1 (4.9 SD)	1	1	0	0	1	0	1	1	1	1	1	3	0	3	1	0	31	3	8	1	2	0	The work was supported by National Institute on Aging (NIA) grants R01 AG08724 and P30 AG17265, and by an Alzheimer’s Association/ Zenith Fellows Award.	1
Andel 2008 (Regular exercise)	Self-report of "Hardly any PA"	None	Four categories	OR	0.0842374	Self-report of "regular exercise"	2	0		0.36		0.17		0.74	0.375217	413	Sweden	2008	Case-control study	48.1 (4.9 SD)	1	1	0	0	1	0	1	1	1	1	1	3	0	3	1	0	31	3	8	1	2	0	The work was supported by National Institute on Aging (NIA) grants R01 AG08724 and P30 AG17265, and by an Alzheimer’s Association/ Zenith Fellows Award.	1
Andel 2008 (Hard training)	Self-report of "Hardly any PA"	None	Four categories	OR	0.0842374	Self-report of "hard training"	2	1		0.72		0.42		1.22	0.272028	372	Sweden	2008	Case-control study	48.1 (4.9 SD)	1	1	0	0	1	0	1	1	1	1	1	3	0	3	1	0	31	3	8	1	2	0	The work was supported by National Institute on Aging (NIA) grants R01 AG08724 and P30 AG17265, and by an Alzheimer’s Association/ Zenith Fellows Award.	1
Beauchet 2021	Physical activity for the Elderly Score : score below the lowest tertile	Low PA	Dichotomous	OR	0.0355	Physical activity for the Elderly Score: score above the lowest tertile	1	1	0.7127	0.720044	0.3718	0.380281	1.3662	1.34867	0.32295	1098	Canada	2021	Prospective cohort study	73.8	3	0	0	1	0	0	0	0	0	0	1	3	0	0	0	0	3	1	0	0	3	0	The NuAge Study was funded by the Canadian Institutes of Health Research (CIHR; MOP62842). The NuAge Database and Biobank are supported by the Fonds de recherche du Québec (FRQ; 2020-VICO279753), the Quebec Network for Research on Aging funded by the FRQ-Santé and by the Merck-Frosst Chair funded by La Fondation de l’Université de Sherbrooke.	1
Blasko 2014			Continuous	OR	0.293233	Composite score of physical activities (diversity)		1	0.87	0.9327	0.77	0.8775	0.97	0.984886	0.0294512	399	Austria	2014	Prospective cohort study	75.8 years	3	1	0	0	0	0	0	0	0	0	1	3	0	3	0	0	5	2	0	0	3	0	The study authors acknowledge the funding and organization of the Vienna Transdanube Aging study by the Ludwig Boltzmann Society, Ludwig Boltzmann Institute of Aging Research (head: Prof. KarlHeinz Tragl).	1
Carlson 2008			Continuous	OR	0.5	Summary score of gardening, sports and outdoor activities		1	0.99	0.994987	0.73	0.8544	1.33	1.15326	0.0765166	294	USA	2008	Case-control study	44.7 years	1	0	0	1	1	0	0	0	0	0	1	0	0	3	1	0	28	3	2		3	0	The work was supported by grants from the National Institute on Aging, R01 AG08549, RO1 AG19825-02 and R01 AG11703-10.	1
Chang 2010 (≤5h)	None	None	Three categories	OR	0.0372093	≤5h of PA per week	1	0		0.6		0.41		0.88	0.194838	3016	Iceland	2010	Prospective cohort study	51 years	2	0	0	1	1	0	0	1	1	1	0	3	0	3	1	0	26	3	7	0	2	0	This study was funded by National Institutes of Health contract N01-AG-12100, the National Institute on Aging Intramural Research Program, the Icelandic Heart Association, the Icelandic Parliament, and the Icelandic Center for Research.	1
Chang 2010 (>5h)	None	None	Three categories	OR	0.0372093	> 5h of PA per week	2	1		0.77		0.35		1.59	0.386111	1930	Iceland	2010	Prospective cohort study	51 years	2	0	0	1	1	0	0	1	1	1	0	3	0	3	1	0	26	3	7	0	2	0	This study was funded by National Institutes of Health contract N01-AG-12100, the National Institute on Aging Intramural Research Program, the Icelandic Heart Association, the Icelandic Parliament, and the Icelandic Center for Research.	1
de Bruijn 2013			Continuous	HR	0.115089	SDs of log transformed MET hours per week		1	1	1	0.89	0.895889	1.12	1.11199	0.0551249	3771	the Netherlands	2013	Prospective cohort study	72.7 (7.2 SD) years	3	0	0	1	1	1	1	1	1	1	1	3	1	3	1	0	8.8	2	11	0	2	0	Acknowledgments: The Rotterdam Study is sponsored by the Erasmus Medical Center and Erasmus University Rotterdam, The Netherlands Organization for Scientific Research (I), The Netherlands Organization for Health Research and Development (ZonMW), the Research Institute for Diseases in the Elderly (RIDE), The Netherlands Genomics Initiative, the Ministry of Education, Culture and Science, the Minis…	1
Deckers 2018	No form of physical activity or exercise during the preceding week	None	Dichotomous	OR	0.235	One or more forms of physical activity or exercise (e.g. walking, cycling, do-it-yourself, gardening, etc.) during the preceding week	1	1	0.78	0.883176	0.44	0.663325	1.41	1.18743	0.148542	323	UK	2018	Prospective cohort study	88.0	3	0	0	1	1	0	0	1	1	0	1	3	0	0	1	0	18	2	3	0	3	0	The work was supported by a fellowship (Kay Deckers) from Alzheimer Nederland and the Alzheimer’s Society UK [grant number WE.15-2015-01]. The list of all the past CC75C sponsors for financial support spanning two decades is available at http://www.cc75c.group.cam.ac.uk/background/grants/. Current funding : the Abbeyfield Society. CC75C has been a member study of the National Institute for Health…	1
Dupré 2020	None	None	Three categories	HR	0.0585141	Total PA amount highest tertile (intensity*(times/month)*(months/year))	2	1	1.17	1.16408	0.59	0.597279	2.32	2.23097	0.336175	761	France	2020	Prospective cohort study	72-97 years (mean not given)	4	0	0	1	1	0	1	1	1	1	1	3	1	0	0	0	4.6	1	9	0	3	0	The Three-city study is conducted under a partnership agreement between the Institut National de la Santé et de la Recherche Médicale (INSERM), Victor-Segalen Bordeaux II University, and Sanofi- Aventis. The Three-city study was also supported by the Caisse Nationale d’Assurance Maladie des Travailleurs Salariés, Direction Générale de la Santé, MGEN, the Institut de la Longévité, Agence Française…	2
Dupré 2020	None	None	Three categories	HR	0.0585141	Total PA amount second tertile (intensity*(times/month)*(months/year))	1	0	1.12	1.116	0.69	0.696424	1.81	1.76694	0.237512	761	France	2020	Prospective cohort study	72-97 years (mean not given)	4	0	0	1	1	0	1	1	1	1	1	3	1	0	0	0	4.6	1	9	0	3	0	The Three-city study is conducted under a partnership agreement between the Institut National de la Santé et de la Recherche Médicale (INSERM), Victor-Segalen Bordeaux II University, and Sanofi- Aventis. The Three-city study was also supported by the Caisse Nationale d’Assurance Maladie des Travailleurs Salariés, Direction Générale de la Santé, MGEN, the Institut de la Longévité, Agence Française…	2
Elwood 2013	< 2miles walking to work daily and < 10 miles cycling to work daily and vigorous exercise is not a habit	Moderate PA	Dichotomous	OR	0.0644898	walking ≥2 miles to work each day, or cycling ≥10 miles to work each day, or ‘vigorous’ exercise described as a regular habit	2	1		0.43		0.23		0.78	0.311534	2235	United Kingdom	2013	Prospective cohort study	45-59 years (mean, spread not told)	1	0	0	1	1	1	0	0	1	0	0	0	0	3	1	0	30	3	3	0	2	0	"No current external funding sources for this study."	1
Gelber 2012	Three lower quartiles (the highest mean 7.2h light PA or 4.4h moderate PA per day)	Moderate PA	Dichotomous	OR	0.0643022	Highest quartile of light or moderate PA (mean 7.2 h light PA/day or 4.4 h of moderate activity)	2	1		0.65		0.48		0.88	0.154626	3468	USA	2012	Case-control study nested in prospective cohort study	52 years	2	0	0	1	1	0	1	1	1	1	1	0	1	3	1	0	25	3	9	0	1	0	The study was supported by a contract (N01-AG-4-2149) and grant (1-R01-AG17155-01A1) from the National Institute on Aging, a contract (N01-HC-05102) from the National Heart, Lung, and Blood Institute, and by the Office of Research and Development, Medical Research Service, Department of Veterans Affairs.	1
Grasset 2017	Self-report of "no sports practice"	Low PA	Dichotomous	HR	0.23406	Self-report of "sports practice"		1	0.84	0.857364	0.72	0.746322	1	1	0.0707683	3670	France	2017	Longitudinal cohort study	At least 65 years (mean not presented and a reference article is not available)	3	1	0	0	1	1	1	1	1	1	0	3	0	3	0	0	11.57	2	7	0	3	0	The PAQUID cohort was supported by IPSEN France, NOVARTIS Pharma France, and the CNSA (Caisse Nationale de Solidarite et d'Autonomie).	2
Gross 2017	Lowest 90% of MET h/day	Moderate PA	Continuous, dichotomous	HR	0.043	Highest 10% of MET h/day	2	1	1.48	1.46461	0.33	0.334871	6.62	5.87106	0.730624	646	USA	2017	Prospective cohort study	47.1 (5.1 SD)	1	0	0	1	1	1	1	1	0	1	0	3	0	3	1	1	33	3	5	0	2	0	Grants AG01760, DK02856, and DK07732 from the National Institutes of Health, Bethesda, grant K01-AG050699 from the National Institute on Aging, grant K01-AG048765 from the National Institute on Aging	1
Gureje 2011 (Moderate PA)	< 6 MET-h/wk	Low PA	Three categories	OR	0.0693878	≥3 days of vigorous PA of at least 20 min/day OR ≥5 days of moderate PA or walking of ≥ 30 min/day	2	0	1	1	0.37	0.386914	2.5	2.26433	0.484466	612	Nigeria	2011	Prospective cohort study	74.5 (SD 8.4)	3	0	0	1	1	0	0	1	1	0	1	3	0	3	1	0	3.3	1	3	0	3	0	The Wellcome Trust	1
Gureje 2011 (High PA)	< 6 MET-h/wk	Low PA	Three categories	OR	0.0693878	Vigorous PA ≥3 days and accumulating at least 1500 MET-minutes/wk or any combination of light, moderate or vigorous PA ≥ 3000 MET-minutes/week	2	1		0.69		0.23		1.87	0.534596	612	Nigeria	2011	Prospective cohort study	74.5 (SD 8.4)	3	0	0	1	1	0	0	1	1	0	1	3	0	3	1	0	3.3	1	3	0	3	0	The Wellcome Trust	1
Hansson 2019 (Malmö, intermediate tertile)	Lowest tertile	Low PA	Tertiles, continuous	HR	0.0666214	Second tertile of MET	1	0	1.01	1.00966	0.88	0.883608	1.17	1.16325	0.0701423	10323	Sweden	2019	Prospective cohort study	median 57.5 (IQR 51.0–63.8)	2	1	0	0	1	0	1	1	1	1	1	3	0	3	1	0	15	2	12	0	3	0	The study was funded by the Strategic Research Area MultiPark (Multidisciplinary Research focused on and Parkinson’s disease and neurodegenerative disorders) at Lund University, the Swedish Alzheimer Foundation, the Swedish Brain Foundation, the European Research Council, the Swedish Research Council, the Knut and Alice Wallenberg Foundation, the Marianne and Marcus Wallenberg Foundation, Crafoor…	1
Hansson 2019 (Malmö, high tertile)	Lowest tertile	Low PA	Tertiles	HR	0.0666214	Highest tertile of MET	2	1	0.96	0.96131	0.83	0.834827	1.1	1.09626	0.0694988	10316	Sweden	2019	Prospective cohort study	median 57.5 (IQR 51.0–63.8)	2	1	0	0	1	0	1	1	1	1	1	3	0	3	1	0	15	2	12	0	3	0	The study was funded by the Strategic Research Area MultiPark (Multidisciplinary Research focused on and Parkinson’s disease and neurodegenerative disorders) at Lund University, the Swedish Alzheimer Foundation, the Swedish Brain Foundation, the European Research Council, the Swedish Research Council, the Knut and Alice Wallenberg Foundation, the Marianne and Marcus Wallenberg Foundation, Crafoor…	1
Hessler 2016	No vigorous PA	Moderate PA	Three categories	HR	0.083	vigorous PA ≥ 3 times per week	2	1	0.55	0.560706	0.4	0.410426	0.76	0.767842	0.159793	1917	Germany	2016	Prospective population-based study	67.28 (SD 7.57)	3	0	0	1	1	0	0	1	1	0	1	3	0	3	0	0	6.7	2	3	0	3	0	The study was supported primarily by the health insurance company Allgemeine Ortskrankenkasse Bayern (AOK Bayern). Further support for different time periods came from German Stroke Foundation, Bayer Vital GmbH, BerlinChemie AG, Organon Pharmaceuticals, Ratiopharm GmbH, Sanofi-Synthelabo GmbH, TEVA Pharmaceutical Industries Ltd	2
Hessler 2016	No vigorous PA	Moderate PA	Three categories	HR	0.083	vigorous PA 1-2 times/wk	1	0	0.72	0.728678	0.55	0.560706	0.95	0.952031	0.135051	1629	Germany	2016	Prospective population-based study	67.28 (SD 7.57)	3	0	0	1	1	0	0	1	1	0	1	3	0	3	0	0	6.7	2	3	0	3	0	The study was supported primarily by the health insurance company Allgemeine Ortskrankenkasse Bayern (AOK Bayern). Further support for different time periods came from German Stroke Foundation, Bayer Vital GmbH, BerlinChemie AG, Organon Pharmaceuticals, Ratiopharm GmbH, Sanofi-Synthelabo GmbH, TEVA Pharmaceutical Industries Ltd	2
Kivimäki 2019 (FPS)	Less than 0.5 hour of each (brisk walking, jogging, or running) per week	Low PA	Dichotomous	HR	0.0066	More than 0.5 hour of any of the following (brisk walking, jogging, or running) per week.	1	1	0.92	0.920243	0.7	0.700695	1.2	1.19921	0.137077	46529	Finland	2019	Prospective cohort study	44.6	1	0	0	1	1	0	0	1	1	1	1	3	0	0	0	0	15.5	2	7	0	1	0	No information	0
Kivimäki 2019 (HeSSup)	Less than 0.5 hour of each (brisk walking, jogging, or running) per week.	Low PA	Dichtomous	HR	0.0034	More than 0.5 hour of any of the following (brisk walking, jogging, or running) per week.	1	1	1.2	1.19959	0.58	0.580415	2.5	2.49363	0.371875	21386	Finland	2019	Prospective cohort study	36.7	1	0	0	1	1	0	0	1	1	1	1	3	0	0	0	0	14.8	2	7	0	3	0	The Finnish Academy, the Yrjö Jahnsson Foundation, the Emil Aaltonen Foundation, and the Gyllenberg Foundation.	1
Kivimäki 2019 (Still Working)	Sport activities less than a couple of times per month	Low PA	Dichotomous	HR	0.0152	Sport activities more than a couple of times per month	1	1	0.98	0.98015	0.65	0.651741	1.47	1.46473	0.206577	8957	Finland	2019	Prospective cohort study	40.9	1	0	0	1	1	0	0	1	1	1	1	3	0	0	0	0	21.6	3	6	0	3	0	No information	0
Kivimäki 2019 (WOLF N)	No or very little exercise, only occasional walks.	Low PA	Dichotomous	HR	0.0019	More than no or very little exercise, only occasional walks.	1	1	0.63	0.630222	0.06	0.0600536	7.14	7.09849	1.21745	4215	Sweden	2019	Prospective cohort study	44.1	1	0	0	1	1	0	0	1	1	1	1	3	0	0	1	0	12.6	2	7	0	2	0	Swedish Work Environment Fund	1
Kunutsor 2020 (Tertile 2)	Lowest tertile (0.53-239.42 MET-h/y)	Low PA	Three categories	HR	0.0869	Conditioning LTPA: Middle tertile (239.43-677.64 MET-h/y)	2	0	0.86	0.865413	0.61	0.620776	1.2	1.18932	0.165859	1197	Finland	2020	Prospective cohort study	53	1	1	0	0	1	0	1	0	1	1	1	0	0	0	1	0	24.9	3	10	0	2	0	The authors acknowledge the Finnish Foundation for Cardiovascular Research, Helsinki, Finland, for supporting the Kuopio Ischemic Heart Disease risk factor study. SKK acknowledges support from the NIHR Biomedical Research Centre at University Hospitals Bristol and Weston NHS Foundation Trust and the University of Bristol. PW acknowledges support from the Dr.-Johannes-and Hertha-Tuba Foundation.	1
Kunutsor 2020 (Tertile 3)	Lowest tertile (0.53-239.42 MET-h/y)	Low PA	Three categories	HR	0.0869	Conditioning LTPA: Highest tertile (677.65- 8981.03 MET-h/y)	2	1	0.96	0.961721	0.69	0.699665	1.34	1.31981	0.161898	1197	Finland	2020	Prospective cohort study	53	1	1	0	0	1	0	1	0	1	1	1	0	0	0	1	0	24.9	3	10	0	2	0	The authors acknowledge the Finnish Foundation for Cardiovascular Research, Helsinki, Finland, for supporting the Kuopio Ischemic Heart Disease risk factor study. SKK acknowledges support from the NIHR Biomedical Research Centre at University Hospitals Bristol and Weston NHS Foundation Trust and the University of Bristol. PW acknowledges support from the Dr.-Johannes-and Hertha-Tuba Foundation.	1
Kim 2011			Ordinal	OR	0.0868726	a 4-point scale (very active, fairly active, not very active, not at all active) of PA		1		0.39		0.23		0.64	0.261069	518	South Korea	2011	Prospective cohort study	71.8 years (SD 4.9 -5.7)	3	0	0	1	1	0	1	1	1	1	1	3	1	3	1	0	2.4	1	6	0	3	0	A grant of the Korea Health 21 R&D, Ministry of Health and Welfare, Republic of Korea (A050174). - RS is funded by NIHR Biomedical Research Centre for Mental Health, The South London and Maudsley NHS Foundation Trust & The Institute of Psychiatry, King’s College London	1
Larson 2006	Exercise < 3 times/wk (15min duration)	Low PA	Dichotomous	HR	0.1176	PA ≥3 times per week	1	1	0.68	0.693506	0.48	0.495622	0.96	0.962356	0.169278	1343	USA	2006	Prospective cohort study	73.8 years	3	0	0	1	1	1	1	1	1	1	1	3	1	3	0	0	6.2	2	15	0	3	0	Grant Support: By the National Institute of Aging (grant AG06781). Potential Financial Conflicts of Interest: Grants received: L. Teri (National Institutes of Health).	1
Laurin 2001 (Men, low PA)	No PA	None	Four categories	OR	0.0617551	PA <3 times per week	1	0	0.96	0.962377	0.4	0.415392	2.31	2.13711	0.417854	322	Canada	2001	Prospective cohort study	Not told from at least 65 years to over 85 years	3	0	0	1	1	0	1	1	1	1	1	3	0	1	1	1	5	2	9	0	2	0	The core study was funded by the Seniors' Independence Research Program, through the National Health Research and Development Program (NHRDP) of Health Canada (Project No. 6606-3954-MC [S]). Additional funding was provided by Pfizer Canada Inc through the Medical Research Council/Pharmaceutical Manufacturers Association of Canada Health Activity Program, NHRDP (Project No. 6603-1417-302 [R]), Bay…	2
Laurin 2001 (Men, moderate PA)	No PA	None	Four categories	OR	0.0617551	PA ≥3 times per week at an intensity of walking	1	0		0.73		0.4		1.35	0.310305	699	Canada	2001	Prospective cohort study	Not told from at least 65 years to over 85 years	3	0	0	1	1	0	1	1	1	1	1	3	0	1	1	1	5	2	9	0	2	0	The core study was funded by the Seniors' Independence Research Program, through the National Health Research and Development Program (NHRDP) of Health Canada (Project No. 6606-3954-MC [S]). Additional funding was provided by Pfizer Canada Inc through the Medical Research Council/Pharmaceutical Manufacturers Association of Canada Health Activity Program, NHRDP (Project No. 6603-1417-302 [R]), Bay…	2
Laurin 2001 (Men, high PA)	No PA	None	Four categories	OR	0.0617551	PA ≥3 times per week at an intensity greater than walking	2	1		0.92		0.47		1.74	0.333905	546	Canada	2001	Prospective cohort study	Not told from at least 65 years to over 85 years	3	0	0	1	1	0	1	1	1	1	1	3	0	1	1	1	5	2	9	0	2	0	The core study was funded by the Seniors' Independence Research Program, through the National Health Research and Development Program (NHRDP) of Health Canada (Project No. 6606-3954-MC [S]). Additional funding was provided by Pfizer Canada Inc through the Medical Research Council/Pharmaceutical Manufacturers Association of Canada Health Activity Program, NHRDP (Project No. 6603-1417-302 [R]), Bay…	2
Laurin 2001 (Women, low PA)	No PA	None	Four categories	OR	0.0617551	PA <3 times per week	1	0	0.63	0.644732	0.32	0.334027	1.25	1.23099	0.332744	595	Canada	2001	Prospective cohort study	Not told from at least 65 years to over 85 years	3	0	0	1	1	0	1	1	1	1	1	3	0	1	1	1	5	2	9	0	2	0	The core study was funded by the Seniors' Independence Research Program, through the National Health Research and Development Program (NHRDP) of Health Canada (Project No. 6606-3954-MC [S]). Additional funding was provided by Pfizer Canada Inc through the Medical Research Council/Pharmaceutical Manufacturers Association of Canada Health Activity Program, NHRDP (Project No. 6603-1417-302 [R]), Bay…	2
Laurin 2001 (Women, moderate PA)	No PA	None	Four categories	OR	0.0617551	PA ≥3 times per week at an intensity of walking	1	0		0.88		0.57		1.36	0.221838	1144	Canada	2001	Prospective cohort study	Not told from at least 65 years to over 85 years	3	0	0	1	1	0	1	1	1	1	1	3	0	1	1	1	5	2	9	0	2	0	The core study was funded by the Seniors' Independence Research Program, through the National Health Research and Development Program (NHRDP) of Health Canada (Project No. 6606-3954-MC [S]). Additional funding was provided by Pfizer Canada Inc through the Medical Research Council/Pharmaceutical Manufacturers Association of Canada Health Activity Program, NHRDP (Project No. 6603-1417-302 [R]), Bay…	2
Laurin 2001 (Women, high PA)	No PA	None	Four categories	OR	0.0617551	PA ≥3 times per week at an intensity greater than walking	2	1		0.57		0.26		1.19	0.388017	620	Canada	2001	Prospective cohort study	Not told from at least 65 years to over 85 years	3	0	0	1	1	0	1	1	1	1	1	3	0	1	1	1	5	2	9	0	2	0	The core study was funded by the Seniors' Independence Research Program, through the National Health Research and Development Program (NHRDP) of Health Canada (Project No. 6606-3954-MC [S]). Additional funding was provided by Pfizer Canada Inc through the Medical Research Council/Pharmaceutical Manufacturers Association of Canada Health Activity Program, NHRDP (Project No. 6603-1417-302 [R]), Bay…	2
Lee 2015 (J Am Med)	No "aerobic exercise" (not specified further)	None	Dichotomous	OR	0.105395	Aerobic exercise (not specified further)	1	1	0.81	0.9	0.68	0.82	0.95	0.97	0.042855	11512	Hong Kong, China	2015	Prospective cohort study	74,2 years (range or SD not given)	3	1	0	0	1	0	1	1	1	1	1	3	0	3	0	0	6	2	11	0	3	0	The study was funded by the Health and Health Services Research Fund of the Government of Hong Kong in 2011 (grant 09100071)	1
Lin 2019	Physical activities of (1) Time: <20 min/day or Intensity: lower than moderate intensity; (2) Frequency <1 day/week.	Low PA	Dichotomous	OR	0.065	Physical activity meeting the following criteria: (1) Time: ≥20 min/day; (2) Intensity: moderate intensity (i.e., brisk walking, jogging, climbing stairs, etc.) and/or vigorous intensity (i.e., long-distance running, rope skipping, basketball, etc.); (3) Frequency ≥4 days/week.	1	1	0.3881	0.404175	0.2526	0.265498	0.5965	0.612566	0.213278	1399	China	2019	Prospective cohort study	70.3	3	0	0	1	0	0	0	0	0	0	0	3	0	0	1	0	1	1	0	0	3	0	The study was funded by grants from the National Key R&D Program of China (2017YFC1310501500), Clinical research center project of Shanghai Mental Health Center (CRC2017ZD02), Western medical guidance project of Shanghai Science and Technology Commission (17411970100), National Natural Science Foundation of China (81301139 and 81501203), and Precision medical research project of Shanghai Jiao Ton…	1
Lipnicki 2017			Continuous	OR	0.118402	Number of PA activities		1	0.91	0.9539	0.71	0.8426	1.17	1.08167	0.0637154	701	Australia	2017	Prospective cohort study	78.7 (4SD 4.8) years	3	0	0	1	1	0	0	1	1	0	1	3	0	3	0	0	6	2	3	0	3	0	The Sydney Memory and Ageing Study was supported by a National Health and Medical Research Council of Australia Program Grant (ID 350833) and a Capacity Building Grant (ID568940)	1
Llamas-Velasco 2015 (Light)	Sedentary lifestyle (i.e., only minimal house chores or short walks at home)	None	Four categories	HR	0.0432	Regular house chores, walks independently at home	1	0	0.53	0.535498	0.34	0.344966	0.82	0.823244	0.221889	1128	Spain	2015	Prospective cohort study	75,96 years (SD, range not given)	3	0	0	1	1	0	1	1	1	1	1	3	0	3	1	0	3.2	1	7	0	3	0	Sara Llamas is supported by the Instituto de Salud Carlos III (ISCIII; Spanish Biomedical Research Institute) through a “Río Hortega” contract. The Spanish Health Research Agency and the Spanish Office of Science and Technology have supported NEDICES	1
Llamas-Velasco 2015 (Moderate)	Sedentary lifestyle (i.e., only minimal house chores or short walks at home)	None	Four categories	HR	0.0432	Regular house chores, walks up to one kilometer per day	1	0	0.45	0.455469	0.27	0.274367	0.76	0.764012	0.261255	944	Spain	2015	Prospective cohort study	75,96 years (SD, range not given)	3	0	0	1	1	0	1	1	1	1	1	3	0	3	1	0	3.2	1	7	0	3	0	Sara Llamas is supported by the Instituto de Salud Carlos III (ISCIII; Spanish Biomedical Research Institute) through a “Río Hortega” contract. The Spanish Health Research Agency and the Spanish Office of Science and Technology have supported NEDICES	1
Llamas-Velasco 2015 (High)	Sedentary lifestyle (i.e., only minimal house chores or short walks at home)	None	Four categories	HR	0.0432	Heavy housework, walks more than one kilometer or practices any sport regularly	1	1	0.29	0.29456	0.16	0.162982	0.52	0.525509	0.298655	1032	Spain	2015	Prospective cohort study	75,96 years (SD, range not given)	3	0	0	1	1	0	1	1	1	1	1	3	0	3	1	0	3.2	1	7	0	3	0	Sara Llamas is supported by the Instituto de Salud Carlos III (ISCIII; Spanish Biomedical Research Institute) through a “Río Hortega” contract. The Spanish Health Research Agency and the Spanish Office of Science and Technology have supported NEDICES	1
Luck 2014			Continuous	HR	0.112779	Number of PA activities		1	0.79	0.799809	0.7	0.712461	0.9	0.905298	0.0611069	2465	Germany	2014	Prospective cohort study	81.1 (SD 3.5) years	4	0	0	1	1	1	1	1	1	0	1	3	1	3	0	0	4.5	1	21	0	2	0	The study was funded by the German Federal Ministry of Education and Research (grants KND 01GI0102, 01GI0420, 01GI0422, 01GI0423, 01GI0429, 01GI0431, 01GI0433 and 01GI0434; and grants KNDD 01GI0710, 01GI0711, 01GI0712, 01GI0713, 01GI0714, 01GI0715, 01GI0716 and 01ET1006B). T. Luck was supported in writing the publication by a research fellowship from the German Research Foundation (grant: Lu 1730…	1
Nabe-Nielsen 2021 (Light)	Mainly sedentary	Low PA	Three categories	RR	0.148	Light physical activity at least 4 hours per week	1	0		0.8		0.6		1.08	0.149946	2027	Denmark	2021	Prospective cohort study	48.9	1	1	0	0	1	0	0	0	1	1	1	0	0	0	1	0	29.3	3	12	0	2	0	The Working Environment Research Fund (grant number 10-2015-03 20150017498)	1
Nabe-Nielsen 2021 (Vigorous)	Mainly sedentary	Low PA	Three categories	RR	0.148	Vigorous physical activity for at least 3 hours per week or high intensity, competitive sport regularly (that is several times/week)	2	1		0.7		0.46		1.06	0.212959	703	Denmark	2021	Prospective cohort study	48.9	1	1	0	0	1	0	0	0	1	1	1	0	0	0	1	0	29.3	3	12	0	2	0	The Working Environment Research Fund (grant number 10-2015-03 20150017498)	1
Najar 2019	Completely inactive, for example at most watching television and going to the movies	None	Dichotomous	HR	0.223	Light physical activity for a minimum of 4 h/wk, such as walking, gardening, bowling, or cycling for half an hour a day, or regular physical training, such as running, tennis, or swimming, for at least 2–3 h/wk, or regular–intense physical training such as heavy exercise, for example running or swimming several times/week, or engaging in competitive sports.	1	1	0.67	0.697463	0.46	0.491402	0.99	0.991197	0.178993	779	Sweden	2019	Prospective cohort study	47.2	1	0	0	1	1	0	0	0	1	1	0	1	0	0	1	0	44	3	4	0	2	0	The study was supported by the Swedish Research Council (nos. 11267, 825-2007-7462, 825-2012-5041, 2013–8717, 2015–02830), Swedish Research Council for Health, Working Life and Welfare (nos. 2001–2646, 2001-28352003-0234, 2004-0150, 2006-0020, 2008-1229, 2012-1138, 2004-0145, 2006-0596, 2008-1111, 2010-0870, 2013-1202, AGECAP 2013–2300, 2013–2496, Epilife 2006-1506), the Swedish Alzheimer Foundat…	1
Paganini-Hill 2016	at most 1h of vigorous exercise/wk	Low PA	Dichotomous	HR	0.78134	≥2 h/d of vigorous exercise	2	1	0.81	0.906282	0.58	0.749913	1.12	1.04667	0.0850532	343	USA	2016	Prospective cohort study	93 (SD 2.6, range 90-103) years	4	0	0	1	1	0	0	1	1	0	0	3	0	3	1	0	23	3	3	0	2	0	Supported by grants R01CA32197 and R01AG21055 from the National Institutes of Health, the Earl Carroll Trust Fund, and Wyeth-Ayerst Laboratories.	2
Palta 2019 (High physical activity)	No physical activity	None	Four categories	HR	0.099	High physical activity (1173–7530 MET-min/week)	2	1	0.72	0.730426	0.61	0.62235	0.86	0.866197	0.0843389	3568	USA	2019	Prospective cohort study	59.9	2	1	0	0	1	0	0	1	1	1	1	3	1	0	0	0	17.4	2	8	0	3	0	The Atherosclerosis Risk in Communities Study is carried out as a collaborative study supported by National Heart, Lung, and Blood Institute contracts (HHSN268201100005C, HHSN268201100006C, HHSN268201100007C, HHSN268201100008C, HHSN268201100009C, HHSN268201100010C, HHSN268201100011C, and HHSN268201100012C). Neurocognitive data was collected by U01 HL096812, HL096814, HL096899, HL096902, and HL096…	1
Palta 2019 (Low physical activity)	No physical activity	None	Four categories	HR	0.099	Low physical activity (1–608 MET-min/week)	1	0	0.88	0.885431	0.75	0.759687	1.04	1.03787	0.0795973	3568	USA	2019	Prospective cohort study	59.9	2	1	0	0	1	0	0	1	1	1	1	3	1	0	0	0	17.4	2	8	0	3	0	The Atherosclerosis Risk in Communities Study is carried out as a collaborative study supported by National Heart, Lung, and Blood Institute contracts (HHSN268201100005C, HHSN268201100006C, HHSN268201100007C, HHSN268201100008C, HHSN268201100009C, HHSN268201100010C, HHSN268201100011C, and HHSN268201100012C). Neurocognitive data was collected by U01 HL096812, HL096814, HL096899, HL096902, and HL096…	1
Palta 2019 (Middle physical activity)	No physical activity	None	Four categories	HR	0.099	Middle physical activity (609–1172 MET-min/week)	2	0	0.77	0.779143	0.65	0.661794	0.91	0.914208	0.0824243	3568	USA	2019	Prospective cohort study	59.9	2	1	0	0	1	0	0	1	1	1	1	3	1	0	0	0	17.4	2	8	0	3	0	The Atherosclerosis Risk in Communities Study is carried out as a collaborative study supported by National Heart, Lung, and Blood Institute contracts (HHSN268201100005C, HHSN268201100006C, HHSN268201100007C, HHSN268201100008C, HHSN268201100009C, HHSN268201100010C, HHSN268201100011C, and HHSN268201100012C). Neurocognitive data was collected by U01 HL096812, HL096814, HL096899, HL096902, and HL096…	1
Peeters 2020 (Highly active)	Not very active	Low PA	Three categories	OR	0.054	Highly active	1	1	0.44	0.453721	0.24	0.250271	0.67	0.682156	0.255794	762	Cuba	2020	Prospective cohort study	70	3	0	0	1	1	0	1	1	1	1	1	3	0	0	1	0	4.5	1	15	0	3	0	The work was supported by the Alzheimer’s Association and Alzheimer’s Society (GBHI ALZ UK-19-588148). GP, JLG, and AA are Atlantic Fellows for Equity in Brain Health and received fellowships from the Global Brain Health Institute. The Cuban Aging and Alzheimer’s study is part of the 10/66 Dementia Research Group population-based research program in Cuba funded by the Wellcome Trust Health Conseq…	1
Peeters 2020 (Somewhat active)	Not very active	Low PA	Three categories	OR	0.054	Somewhat active	1	0	0.55	0.563698	0.34	0.352565	0.88	0.88574	0.234997	1078	Cuba	2020	Prospective cohort study	70	3	0	0	1	1	0	1	1	1	1	1	3	0	0	1	0	4.5	1	15	0	3	0	The work was supported by the Alzheimer’s Association and Alzheimer’s Society (GBHI ALZ UK-19-588148). GP, JLG, and AA are Atlantic Fellows for Equity in Brain Health and received fellowships from the Global Brain Health Institute. The Cuban Aging and Alzheimer’s study is part of the 10/66 Dementia Research Group population-based research program in Cuba funded by the Wellcome Trust Health Conseq…	1
Podewils 2005 (248 - 742 kcal/wk)	Lowest quartile (PA energy expenditure < 248 kcal/wk)	Low PA	Quartiles	HR	0.142222	PA energy expenditure (248 - 742 kcal/wk)	1	0	1.22	1.20016	0.93	0.934883	1.6	1.53037	0.125725	1013	USA	2005	Prospective cohort study	74.8 years (SD, range not given)	3	1	0	0	1	1	0	1	1	1	0	3	1	3	0	0	6	2	11	0	3	0	The research reported in this article was supported by contracts N01-HC-85079 through N01-HC-85086, N01-HC-35129, and N01-HC-15103 from the National Heart, Lung, and Blood Institute (NHLBI) and grant AG15928 from the National Institute on Aging.	1
Podewils 2005 (743 - 1657 kcal/wk)	Lowest quartile (PA energy expenditure < 248 kcal/wk)	Low PA	Quartiles	HR	0.142222	PA energy expenditure (743 - 1657 kcal/wk)	2	0	0.94	0.944228	0.69	0.706241	1.28	1.25359	0.146379	1013	USA	2005	Prospective cohort study	74.8 years (SD, range not given)	3	1	0	0	1	1	0	1	1	1	0	3	1	3	0	0	6	2	11	0	3	0	The research reported in this article was supported by contracts N01-HC-85079 through N01-HC-85086, N01-HC-35129, and N01-HC-15103 from the National Heart, Lung, and Blood Institute (NHLBI) and grant AG15928 from the National Institute on Aging.	1
Podewils 2005 (> 1657 kcal/wk)	Lowest quartile (PA energy expenditure < 248 kcal/wk)	Low PA	Quartiles	HR	0.142222	PA energy ependiture (> 1657 kcal/wk)	2	1	0.85	0.859603	0.61	0.628137	1.19	1.17326	0.159384	1013	USA	2005	Prospective cohort study	74.8 years (SD, range not given)	3	1	0	0	1	1	0	1	1	1	0	3	1	3	0	0	6	2	11	0	3	0	The research reported in this article was supported by contracts N01-HC-85079 through N01-HC-85086, N01-HC-35129, and N01-HC-15103 from the National Heart, Lung, and Blood Institute (NHLBI) and grant AG15928 from the National Institute on Aging.	1
Ravaglia 2008	Not meeting the PA guidelines	Low PA	Dichotomous	HR	0.11482	Meets the PA quidelines	2	1	0.73	0.741904	0.46	0.475168	1.15	1.13976	0.223189	749	Italy	2008	Prospective cohort study	73.2 (SD 6.0) years	3	0	0	1	1	0	1	1	1	0	1	3	1	3	1	0	3.9	1	9	0	2	0	Supported by grants from the Italian Ministry of University and Scientific Research (basic-oriented research funds).	1
Sabia 2017 (Total PA 8-12 h/wk)	MVPA < 2.5h/wk	Low PA	Dichotomous and continuous	HR	0.031917	MVPA at least 2.5 h/wk	2	1	1.07	1.06879	0.86	0.861945	1.35	1.34241	0.113017	10308	United Kingdom	2017	Prospective cohort study	Dementia analyses: 45,0 years	1	1	0	0	1	0	1	1	1	1	0	3	0	3	0	0	26.6	3	15	0	1	0	The Whitehall II study is supported by grants from the US National Institutes on Aging (R01AG013196; R01AG034454), the UK Medical Research Council (MRC K013351), and the British Heart Foundation (RG/13/2/30098).	1
Shaaban 2019			Continuous	HR	0.0640799	PA minutes per week		1	0.65	0.657508	0.47	0.478253	0.9	0.902954	0.162125	1701	USA	2019	Prospective cohort study	mean 78 years (interquartile range 71 – 83 years)	3	1	0	0	0	0	0	0	0	0	0	3	0	3	0	0	5	2	0	0	3	0	This work was supported in part by the National Institute on Aging at the National Institutes of Health (F31 AG054084 to CES and R01 AG023651 to MG). The content is solely the responsibility of the authors and does not necessarily represent the official views of the National Institutes of Health.	1
Shih 2018	Lowest tertile (< 35 MET-h/week)	Moderate PA	Dichotomous	HR	0.0634	Two highest tertiles (≥ 35 MET-hours/week)	2	1	0.77	0.775765	0.51	0.518182	1.17	1.16358	0.20636	1482	USA	2018	Prospective cohort study	70.0	3	0	0	1	1	0	1	1	1	1	1	3	1	0	1	0	6.5	2	8	0	2	0	The work was supported by National Institute of Environmental Health Sciences R01 ES023451, National Institute on Aging (grants AG012975and AG033751), National Institute of Diabetes, Digestive, and Kidney Diseases DK060753, and KP was funded through a Burroughs Wellcome Fund Population and Laboratory Based Sciences Award.	1
Simons 2006	Walking weekly or less often	Low PA	Dichotomous	HR	0.101604	Walking daily	1	1	1	1	0.78	0.7891	1.28	1.26133	0.11965	2805	Australia	2006	Prospective cohort study	60 years and older (mean, range, SD not told)	3	0	0	1	1	0	1	1	1	1	0	3	0	3	0	1	16	2	16	0	3	0	The Dubbo Study has been funded by the Australian Research Council and the National Health and Medical Research Council and the pharmaceutical industry.	2
Soni 2017	PA < 1 time/wk	Low PA	Four categories	HR	0.035	Mild PA 1x/wk	1	0	0.67	0.673931	0.49	0.494452	0.93	0.931154	0.161473	2060	United Kingdom	2017	prospective cohort study	65,2 years (Sd and range not given)	3	0	0	1	1	1	1	1	1	1	0	3	0	3	1	0	10	2	13	0	3	0	The English Longitudinal Study of Ageing is funded by the National Institute on Aging [grant number 2RO1AG7644-01A1], [grant number 2RO1AG017644] and by a Consortium of UK government departments coordinated by the ESRC. The study was carried out as part of PRIDE (PRomoting Independence in DEmentia). PRIDE was funded by the UK Economic and Social Research Council (ESRC) [grant number ES/L001802/1]…	1
Soni 2017	PA < 1 time/wk	Low PA	Four categories	HR	0.035	MVPA 1x/wk	1	0	0.66	0.66399	0.46	0.464427	0.94	0.940999	0.180137	2038	United Kingdom	2017	prospective cohort study	65,2 years (Sd and range not given)	3	0	0	1	1	1	1	1	1	1	0	3	0	3	1	0	10	2	13	0	3	0	The English Longitudinal Study of Ageing is funded by the National Institute on Aging [grant number 2RO1AG7644-01A1], [grant number 2RO1AG017644] and by a Consortium of UK government departments coordinated by the ESRC. The study was carried out as part of PRIDE (PRomoting Independence in DEmentia). PRIDE was funded by the UK Economic and Social Research Council (ESRC) [grant number ES/L001802/1]…	1
Soni 2017	PA < 1 time/wk	Low PA	Four categories	HR	0.035	MVPA > 1 time/wk	1	1	0.51	0.514451	0.38	0.384203	0.7	0.703732	0.154395	6927	United Kingdom	2017	prospective cohort study	65,2 years (Sd and range not given)	3	0	0	1	1	1	1	1	1	1	0	3	0	3	1	0	10	2	13	0	3	0	The English Longitudinal Study of Ageing is funded by the National Institute on Aging [grant number 2RO1AG7644-01A1], [grant number 2RO1AG017644] and by a Consortium of UK government departments coordinated by the ESRC. The study was carried out as part of PRIDE (PRomoting Independence in DEmentia). PRIDE was funded by the UK Economic and Social Research Council (ESRC) [grant number ES/L001802/1]…	1
Sutin 2019			Ordinal	HR	0.0919	Ranging from 1=hardly ever or never to 4=more than once a week		1	0.91	0.913895	0.86	0.865736	0.96	0.961823	0.0268498	12053	USA	2019	Prospective cohort study	67.31	2	0	0	1	1	0	1	1	1	1	1	3	1	0	0	0	7.4	2	11	0	3	0	Research reported in this publication was supported by the National Institute On Aging of the National Institutes of Health under Award Number R01AG053297 and R03AG051960. The Health and Retirement Study is conducted by the University of Michigan with funding from the National Institute on Aging (U01AG009740). Acknowledgement: Research reported in this publication was supported by the National In…	1
Taaffe 2008 (High function: High PA)	Lowest tertile	Low PA	Tertiles	HR	0.027426	PA score: highest tertile (frequency, duration, intensity)	2	1	1.1	1.09848	0.57	0.573406	2.13	2.09703	0.330787	485	USA	2008	Prospective cohort study	mean 76,6 (range 71-92) years	3	0	0	1	1	1	1	1	1	1	1	0	1	3	1	0	6.1	2	13	0	2	0	This study was supported by contract N01-AG-4-2149 from the National Institute on Aging, contract N01-HC-05102 from the National Heart, Lung, and Blood Institute, and by the Japan Society for the Promotion of Science.	1
Taaffe 2008 (High function: Moderate PA)	Lowest tertile	Low PA	Tertiles	HR	0.027426	PA score: second tertile (frequency, duration, intensity)	2	0	0.49	0.493475	0.21	0.212313	1.1	1.09848	0.419291	485	USA	2008	Prospective cohort study	mean 76,6 (range 71-92) years	3	0	0	1	1	1	1	1	1	1	1	0	1	3	1	0	6.1	2	13	0	2	0	This study was supported by contract N01-AG-4-2149 from the National Institute on Aging, contract N01-HC-05102 from the National Heart, Lung, and Blood Institute, and by the Japan Society for the Promotion of Science.	1
Taaffe 2008 (Low function: High PA)	Lowest tertile	Low PA	Tertiles	HR	0.027426	PA score: highest tertile (frequency, duration, intensity)	2	1	0.5	0.503476	0.28	0.282809	0.89	0.891356	0.330787	290	USA	2008	Prospective cohort study	mean 76,6 (range 71-92) years	3	0	0	1	1	1	1	1	1	1	1	0	1	3	1	0	6.1	2	13	0	2	0	This study was supported by contract N01-AG-4-2149 from the National Institute on Aging, contract N01-HC-05102 from the National Heart, Lung, and Blood Institute, and by the Japan Society for the Promotion of Science.	1
Taaffe 2008 (Low function: Moderate PA)	Lowest tertile	Low PA	Tertiles	HR	0.027426	PA score: second tertile (frequency, duration, intensity)	2	0	0.57	0.573406	0.32	0.323031	0.99	0.990137	0.419291	290	USA	2008	Prospective cohort study	mean 76,6 (range 71-92) years	3	0	0	1	1	1	1	1	1	1	1	0	1	3	1	0	6.1	2	13	0	2	0	This study was supported by contract N01-AG-4-2149 from the National Institute on Aging, contract N01-HC-05102 from the National Heart, Lung, and Blood Institute, and by the Japan Society for the Promotion of Science.	1
Taaffe 2008 (Moderate function: High PA)	Lowest tertile	Low PA	Tertiles	HR	0.027426	PA score: highest tertile (frequency, duration, intensity)	2	1	0.84	0.841863	0.38	0.38328	1.85	1.82841	0.330787	356	USA	2008	Prospective cohort study	mean 76,6 (range 71-92) years	3	0	0	1	1	1	1	1	1	1	1	0	1	3	1	0	6.1	2	13	0	2	0	This study was supported by contract N01-AG-4-2149 from the National Institute on Aging, contract N01-HC-05102 from the National Heart, Lung, and Blood Institute, and by the Japan Society for the Promotion of Science.	1
Taaffe 2008 (Moderate function: Moderate PA)	Lowest tertile	Low PA	Tertiles	HR	0.027426	PA score: second tertile (frequency, duration, intensity)	2	0	1.23	1.22609	0.6	0.603334	2.54	2.48663	0.419291	356	USA	2008	Prospective cohort study	mean 76,6 (range 71-92) years	3	0	0	1	1	1	1	1	1	1	1	0	1	3	1	0	6.1	2	13	0	2	0	This study was supported by contract N01-AG-4-2149 from the National Institute on Aging, contract N01-HC-05102 from the National Heart, Lung, and Blood Institute, and by the Japan Society for the Promotion of Science.	1
Tan 2017	Lowest quintile	Low PA	Dichotomous	HR	0.2545	Quintiles 2-5	2	1	0.775	0.799887	0.568	0.603731	1.064	1.05455	0.249857	1104	USA	2017	Prospective cohort study	70 (7 SD) years	3	0	0	1	1	0	0	0	1	0	0	3	1	3	0	0	22	3	3	0	3	0	The work was supported by the National Institutes of Health/National Heart, Lung, and Blood Institute Contract (NIH/NHLBI, HHSN268201500001I, N01-HC-25195, N01HV28178, R01HL093029, R01 HL131029 U01 HL096917, and 2K24HL04334) and training grant (T32-HL07224), the National Institute on Aging (NIA, R01 AG016495, AG008122, AG031287, AG047645), the National Institute of Neurological Disorders and Stro…	1
Tolppanen 2015 (APOE adjusted result, high PA)	PA never or few times a year	None	Three categories	HR	0.15285	≥ 2-3 times/wk PA causing sweating and breathlessness	2	1	0.72	0.736509	0.51	0.530703	1.01	1.00919	0.163953	695	Finland	2015	Prospective cohort study	CAIDE target population analyses: 51,2 years CAIDE participants: 50.6 (6.0 SD) years	2	1	0	0	1	0	1	1	1	1	1	3	1	0	1	1	24.4	3	8	0	1	0	Anna-Maija Tolppanen and Hilkka Soininen acknowledge financial support by strategic funding of University of Eastern Finland; Alina Solomon received funding from the Academy of Finland (grant 251645), Saastamoinen Foundation, Alzheimerfonden, Stiftelsen Dementia, and Loo och Hans Ostermans stiftelse. Jenni Kulmala received funding from the Academy of Finland (grant 250385) and the European Region…	1
Tolppanen 2015 (APOE adjusted result, high PA)	PA never or few times a year	None	Three categories	HR	0.15285	≤1 time/wk or 2-3 times/month PA causing sweating and breathlessness	1	0	0.69	0.707546	0.51	0.530703	0.94	0.944563	0.147071	618	Finland	2015	Prospective cohort study	CAIDE target population analyses: 51,2 years CAIDE participants: 50.6 (6.0 SD) years	2	1	0	0	1	0	1	1	1	1	1	3	1	0	1	1	24.4	3	8	0	1	0	Anna-Maija Tolppanen and Hilkka Soininen acknowledge financial support by strategic funding of University of Eastern Finland; Alina Solomon received funding from the Academy of Finland (grant 251645), Saastamoinen Foundation, Alzheimerfonden, Stiftelsen Dementia, and Loo och Hans Ostermans stiftelse. Jenni Kulmala received funding from the Academy of Finland (grant 250385) and the European Region…	1
Vaillant 2014	< 500 kcal/wk	Low PA	Dichotomous	OR	0.19403	≥ 500 kcal of PA/wk	1	1	0.12	0.3464	0.02	0.1414	0.63	0.7937	0.44008	84	USA	2014	Prospective cohort study	45- 60 years	2	0	0	1	0	0	0	1	1	0	1	0	0	3	0	0	30	3	0	0	3	0	The work was supported by research grants K05-MH00364, MH42248, and AG034554 from the National Institute of Health.	1
Verdelho 2012	< 30min duration or < 3 times/wk	Low PA	Dichotomous	HR	0.141066	≥ 30 min on ≥ 3 days in a week	2	1	0.61	0.627979	0.38	0.398014	0.98	0.981454	0.230242	638	Finland, Austria, Sweden, Italy, Switzerland, France, Portugal, Germany, the Netherlands, Denmark	2012	Prospective cohort study	74.1 (5 SD) years	3	0	0	1	1	1	0	1	1	0	0	3	0	3	0	0	3	1	6	0	3	0	The LADIS Study was supported by the European Union within the Vth European Framework Program Quality of life and management of living resources (1998–2002), contract No. QLRT-2000-00446.	1
Verghese 2003			Continuous	HR	0.26439	Physically active days (swimming, tennis, babysitting, housework)/wk		1	1	1	0.98	0.982861	1.03	1.02551	0.0108366	469	USA	2003	Prospective cohort study	79.1 years	3	0	0	1	1	0	1	1	1	0	0	3	0	3	0	0	6.6	2	9	0	3	0	Supported by a grant (AGO3949-15) from the National Institute on Aging.	1
Wang 2002 (Less than daily PA)	None	None	Three categories	RR	0.158505	PA less than daily but not none	1	0		0.97		0.42		2.22	0.424747	366	Sweden	2002	Prospective cohort study	81.1 (4.9 SD) years	4	1	0	0	1	1	1	1	1	0	1	3	0	3	0	0	6.4	2	11	0	3	0	Research grants for the research were received from the Karolinska Institutet, the Swedish Medical Research Council, the Swedish Council for Social Research (project F0123/1999), the Swedish Municipal Pension Institute, the Torsten and Ragnar Söderbergs Foundation, the Gamla Tjänarinnor Foundation, the Groschinsky Foundation, the Gun and Bertil Stohne Foundation, and the Stiftelsen Hjälp till Med…	1
Wang 2002 (Daily PA)	None	None	Three categories	RR	0.158505	PA daily	2	1		0.41		0.13		1.31	0.589349	366	Sweden	2002	Prospective cohort study	81.1 (4.9 SD) years	4	1	0	0	1	1	1	1	1	0	1	3	0	3	0	0	6.4	2	11	0	3	0	Research grants for the research were received from the Karolinska Institutet, the Swedish Medical Research Council, the Swedish Council for Social Research (project F0123/1999), the Swedish Municipal Pension Institute, the Torsten and Ragnar Söderbergs Foundation, the Gamla Tjänarinnor Foundation, the Groschinsky Foundation, the Gun and Bertil Stohne Foundation, and the Stiftelsen Hjälp till Med…	1
Wang 2014 (Moderate tertile)	Lowest tertile	Low PA	Tertiles	OR	0.169736	Second tertile of PA according to numbers of blocks walked	1	0	0.65	0.8062	0.44	0.6633	0.97	0.984886	0.100841	607	USA	2014	Prospective cohort study	83.3 (2.8 SD) years	4	0	0	1	1	1	1	1	1	1	0	1	0	3	0	0	5	2	8	0	3	0	Data collection and sharing for SOF and SOF-WISE are supported by grants AG05407, AR35582, AG05394, AR3354, AR35583, R01 AG005407, R01 AG027576-22, 2 R01 AG005394-22A1, 2R01 AG027574-22A1, and 5R01AG026720-04. The study is coordinated by the University of California, San Francisco. SOF data are disseminated by University of California, San Francisco. This study was also supported in part by a VA …	2
Wang 2014 (Highest tertile)	Lowest tertile	Low PA	Tertiles	OR	0.169736	Highest tertile of PA according to numbers of blocks walked	2	1	0.57	0.75498	0.38	0.6164	0.85	0.92195	0.102703	642	USA	2014	Prospective cohort study	83.3 (2.8 SD) years	4	0	0	1	1	1	1	1	1	1	0	1	0	3	0	0	5	2	8	0	3	0	Data collection and sharing for SOF and SOF-WISE are supported by grants AG05407, AR35582, AG05394, AR3354, AR35583, R01 AG005407, R01 AG027576-22, 2 R01 AG005394-22A1, 2R01 AG027574-22A1, and 5R01AG026720-04. The study is coordinated by the University of California, San Francisco. SOF data are disseminated by University of California, San Francisco. This study was also supported in part by a VA …	2
Wu 2020	Low physical activity: <10.5 METs/week	Low PA	Dichotomous	HR	0.1007	Physical activity: ≥10.5 METs/week	2	1	0.62	0.632447	0.44	0.453101	0.89	0.895123	0.173685	1648	China	2020	Prospective cohort study	71.5	3	0	0	1	1	0	1	1	1	1	0	3	1	0	1	1	5.3	2	9	0	3	0	The work was supported by grants from Scientific Research Plan Project of Shanghai Science and Technology Committee [17411950701, 17411950106], National Natural Science Foundation of China, [81773513], Shanghai Municipal Science and Technology Major Project (No. 2018SHZDZX01), ZHANGJIANG LAB, Tianqiao and Chrissy Chen Institute, and the State Key Laboratory of Neurobiology and Frontiers Center fo…	1
Zotcheva 2018	MVPA (out of breath and break into sweat) less than once a week	Low PA	Dichotomous	HR	0.0124	MVPA (out of breath and break into sweat) at least once a week	1	1	0.81	0.810959	0.62	0.621469	1.06	1.0596	0.136812	28916	Norway	2018	Prospective cohort study	43.4	1	0	0	1	1	0	1	1	1	1	1	3	0	3	1	0	25,2	3	8	0	3	0	This study was funded by the Faculty of Medicine and Health Sciences, and the Department of Public Health and Nursing, Norwegian University of Science and Technology, Trondheim, Norway. The Nord-Trøndelag Health Study (The HUNT Study) is a collaboration between HUNT Research Centre (Faculty of Medicine and Health Sciences, Norwegian University of Science and Technology NTNU), Nord-Trøndelag Count…	1
																257983
Abbreviations:
MET = metabolic equivalent of energy expenditure
PA= physical activity
MVPA = moderate to vigorous physical activity
OR = odds ratio
HR= hazard ratio
RR= relative risk
h= hour
wk= week
min = minutes
LTPA = leisure-time physical activity
SD= standard deviation

## Sheet: Alzheimer's disease studies
Publication	Reference category	Reference category group	Measurement of physical activity	Outcome type (OR= odds ratio, HR= hazard ratio, RR= relative risk)	Incidence rate of dementia	Exposure	Physical activity recommendation (1= does not meet, 2= meets, missing value = not applicable)	Highest group (1= highest physical activity group of the study, 0= not highest physical activity group of the study)	HR or OR	RR	Original lower limit (HR or OR)	Lower limit (RR)	Original Upper limit (HR or OR)	Upper limit (RR)	Standard error (SE)	Sample size (category N + reference group N/number of comparisons to the reference group)	Country of origin	Publication year	Design	Age at baseline	Baseline age group (1=30-60 years, 2=70-79 years, 3=80+ years)	Only leisure PA (1= yes, 0=no)	Only work-related PA (1= yes, 0=no)	Both leisure and work-related PA (1= yes, 0=no)	Age used a covariate or included in the model or the cohort is a birth cohort (1= yes, 0=no)	Baseline cognition used as covariate (1= yes, 0= no)	Chronic disease used as a covariate (1= yes, 0=no)	Education used as a covariate or the cohort has the same education (1= yes, 0=no)	Gender used as a covariate (1= yes, 0=no)	Vascular risk factor used as a covariate (1=yes, 0=no)	Follow-up rate (1= ≥ 70%, 0= < 70% or not told)	Gender (0= men, 1= women, 3= men and women)	ApoE ε4 status used as a covariate (1= yes, 0=no)	Is gender interaction tested (0= no interaction, 1= yes interaction, 3= not told)	Participation rate (1= >70% or well designed case-control study or register study, 0= <70% or not told or volunteer recruit)	Separate results for genders (1=yes, 0=no)	Follow-up length (years)	Follow-up length group (1= < 5 years, 2= 5-20 years, 3= at least 20 years)	Total number of covariates	Twin study (1= yes, 0=no)	Quality (1= high, 2= moderate, 3= poor)	Objective measure of physical activity (1= yes, 0=no)	Funding	Funding group (0= funding sources not told, 1= purely non-commercial funding sources, 2= funding also from commercial sources)
Andel 2008 (light PA)	Self-report "Hardly any PA"	None	Four categories	OR	0.0561583	Self-report of "light PA"	1	0	0.64	0.653206	0.41	0.42405	1	1	0.146926	472	Sweden	2008	Case-control study	48.1 (4.9 SD)	1	1	0	0	1	0	1	1	1	1	1	3	0	3	1	0	31	3	8	1	2	0	The work was supported by National Institute on Aging (NIA) grants R01 AG08724 and P30 AG17265, and by an Alzheimer’s Association/ Zenith Fellows Award.	1
Andel 2008 (regular)	Self-report "Hardly any PA"	None	Four categories	OR	0.0561583	Self-report of "regular exercise"	2	0		0.35		0.15		0.87	0.183673	472	Sweden	2008	Case-control study	48.1 (4.9 SD)	1	1	0	0	1	0	1	1	1	1	1	3	0	3	1	0	31	3	8	1	2	0	The work was supported by National Institute on Aging (NIA) grants R01 AG08724 and P30 AG17265, and by an Alzheimer’s Association/ Zenith Fellows Award.	1
Andel 2008 (hard training)	Self-report "Hardly any PA"	None	Four categories	OR	0.0561583	Self-report of "hard training"	2	1		0.66		0.34		1.27	0.237245	431	Sweden	2008	Case-control study	48.1 (4.9 SD)	1	1	0	0	1	0	1	1	1	1	1	3	0	3	1	0	31	3	8	1	2	0	The work was supported by National Institute on Aging (NIA) grants R01 AG08724 and P30 AG17265, and by an Alzheimer’s Association/ Zenith Fellows Award.	1
Annweiler 2012	< 1h of PA/wk	Low PA	Dichotomous	OR	0.140562	At least 1h/wk	1	1	0.84	0.916515	0.47	0.685565	1.53	1.23693	0.140655	498	France	2012	Prospective cohort study	79.8 (3.8 SD) years	2	1	0	0	1	1	1	1	1	1	0	3	0	0	0	0	7	2	11	0	3	0	The work was supported by the French Ministry of Health .	1
de Bruijn 2013			Continuous	HR	0.111212	SDs of log transformed MET hours per week	0	1	1.05	1.04697	0.93	0.933772	1.2	1.18624	0.0644044	4115	the Netherlands	2013	Prospective cohort study	72.7 (7.2 SD) years	2	0	0	1	1	1	1	1	1	1	1	3	1	3	1	0	8.8	2	11	0	2	0	Acknowledgments: The Rotterdam Study is sponsored by the Erasmus Medical Center and Erasmus University Rotterdam, The Netherlands Organization for Scientific Research (I), The Netherlands Organization for Health Research and Development (ZonMW), the Research Institute for Diseases in the Elderly (RIDE), The Netherlands Genomics Initiative, the Ministry of Education, Culture and Science, the Minis…	1
Dupré 2020 (Second tertile)	None	None	Three categories	HR	0.0382807	Total PA amount second tertile (intensity*(times/month)*(months/year))	1	0	1.08	1.07833	0.6	0.604678	1.97	1.93341	0.338962	744	France	2020	Prospective cohort study	72-97 years (mean not given)	3	0	0	1	1	0	1	1	1	1	1	3	1	0	0	0	4.6	1	9	0	2	0	The Three-city study is conducted under a partnership agreement between the Institut National de la Santé et de la Recherche Médicale (INSERM), Victor-Segalen Bordeaux II University, and Sanofi- Aventis. The Three-city study was also supported by the Caisse Nationale d’Assurance Maladie des Travailleurs Salariés, Direction Générale de la Santé, MGEN, the Institut de la Longévité, Agence Française…	2
Dupré 2020 (Highest tertile)	None	None	Three categories	HR	0.0382807	Total PA amount highest tertile (intensity*(times/month)*(months/year))	2	1	1.15	1.14666	0.48	0.484872	2.73	2.64045	0.549891	744	France	2020	Prospective cohort study	72-97 years (mean not given)	3	0	0	1	1	0	1	1	1	1	1	3	1	0	0	0	4.6	1	9	0	2	0	The Three-city study is conducted under a partnership agreement between the Institut National de la Santé et de la Recherche Médicale (INSERM), Victor-Segalen Bordeaux II University, and Sanofi- Aventis. The Three-city study was also supported by the Caisse Nationale d’Assurance Maladie des Travailleurs Salariés, Direction Générale de la Santé, MGEN, the Institut de la Longévité, Agence Française…	2
Gelber 2012	Three lower quartiles (the highest mean 7.2h light PA or 4.4h moderate PA per day)	Moderate PA	Dichotomous	OR	0.033737	Highest quartile of light or moderate PA (mean 7.2 light PA/day or 4.4 of moderate activity)	2	1		0.7		0.46		1.06	0.153061	3468	USA	2012	Case-control study nested in prospective cohort study	52 years	1	0	0	1	1	0	1	1	1	1	1	3	1	3	1	0	25	3	9	0	1	0	"No current external funding sources for this study."	1
Hansson 2019 (Malmö, intermediate)	Lowest tertile	Low PA	Tertiles, continuous	HR	0.0404089	Second tertile of MET	1	0	1.04	1.03915	0.86	0.862471	1.25	1.24362	0.0972322	10323	Sweden	2019	Prospective cohort study	median 57.5 (IQR 51.0–63.8)	1	1	0	0	1	0	1	1	1	1	1	3	0	3	1	0	15	2	12	0	3	0	The study was funded by the Strategic Research Area MultiPark (Multidisciplinary Research focused on and Parkinson’s disease and neurodegenerative disorders) at Lund University, the Swedish Alzheimer Foundation, the Swedish Brain Foundation, the European Research Council, the Swedish Research Council, the Knut and Alice Wallenberg Foundation, the Marianne and Marcus Wallenberg Foundation, Crafoor…	1
Hansson 2019 (Malmö, high)	Lowest tertile	Low PA	Tertiles	HR	0.0404089	Highest tertile of MET	2	1	1.14	1.13674	0.95	0.950974	1.37	1.35967	0.104259	10316	Sweden	2019	Prospective cohort study	median 57.5 (IQR 51.0–63.8)	1	1	0	0	1	0	1	1	1	1	1	3	0	3	1	0	15	2	12	0	3	0	The study was funded by the Strategic Research Area MultiPark (Multidisciplinary Research focused on and Parkinson’s disease and neurodegenerative disorders) at Lund University, the Swedish Alzheimer Foundation, the Swedish Brain Foundation, the European Research Council, the Swedish Research Council, the Knut and Alice Wallenberg Foundation, the Marianne and Marcus Wallenberg Foundation, Crafoor…	1
Kivimäki 2019 (FPS)	Less than 0.5 hour of each (brisk walking, jogging, or running) per week	Low PA	Dichotomous	HR	0.0066	More than 0.5 hour of any of the following (brisk walking, jogging, or running) per week.	1	1	1.1	1.09964	0.75	0.75062	1.61	1.60676	0.194151	41737	Finland	2019	Prospective cohort study	44.6	1	0	0	1	1	0	0	1	1	1	1	3	0	3	0	0	15.5	2	7	0	1	0	No information	0
Kivimäki 2019 (HeSSup)	Less than 0.5 hour of each (brisk walking, jogging, or running) per week.	Low PA	Dichtomous	HR	0.0034	More than 0.5 hour of any of the following (brisk walking, jogging, or running) per week.	1	1	1.69	1.68802	0.65	0.650387	4.35	4.32529	0.483333	21386	Finland	2019	Prospective cohort study	36.7	1	0	0	1	1	0	0	1	1	1	1	3	0	3	0	0	14.8	2	7	0	3	0	The Finnish Academy, the Yrjö Jahnsson Foundation, the Emil Aaltonen Foundation, and the Gyllenberg Foundation.	1
Kivimäki 2019 (Still Working)	Sport activities less than a couple of times per month	Low PA	Dichotomous	HR	0.0152	Sport activities more than a couple of times per month	1	1	0.97	0.970222	0.6	0.601837	1.59	1.58286	0.246683	8034	Finland	2019	Prospective cohort study	40.9	1	0	0	1	1	0	0	1	1	1	1	3	0	3	0	0	21.6	3	6	0	2	0	No information	0
Kunutsor 2020 (Tertile 2)	Lowest tertile (0.53-239.42 MET-h/y)	Low PA	Three categories	HR	0.0535	Conditioning LTPA: Middle tertile (239.43-677.64 MET-h/y)	1	0	0.9	0.902456	0.58	0.586687	1.39	1.37534	0.217338	1197	Finland	2020	Prospective cohort study	53	1	1	0	0	1	0	1	0	1	1	1	0	0	0	1	0	24.9	3	10	0	2	0	The authors acknowledge the Finnish Foundation for Cardiovascular Research, Helsinki, Finland, for supporting the Kuopio Ischemic Heart Disease risk factor study. SKK acknowledges support from the NIHR Biomedical Research Centre at University Hospitals Bristol and Weston NHS Foundation Trust and the University of Bristol. PW acknowledges support from the Dr.-Johannes-and Hertha-Tuba Foundation.	1
Kunutsor 2020 (Tertile 3)	Lowest tertile (0.53-239.42 MET-h/y)	Low PA	Three categories	HR	0.0535	Conditioning LTPA: Highest tertile (677.65- 8981.03 MET-h/y)	2	1	0.98	0.980534	0.64	0.646318	1.49	1.47029	0.209674	1197	Finland	2020	Prospective cohort study	53	1	1	0	0	1	0	1	0	1	1	1	0	0	0	1	0	24.9	3	10	0	2	0	The authors acknowledge the Finnish Foundation for Cardiovascular Research, Helsinki, Finland, for supporting the Kuopio Ischemic Heart Disease risk factor study. SKK acknowledges support from the NIHR Biomedical Research Centre at University Hospitals Bristol and Weston NHS Foundation Trust and the University of Bristol. PW acknowledges support from the Dr.-Johannes-and Hertha-Tuba Foundation.	1
Larson 2006	Exercise < 3 times/wk (15min duration)	Low PA	Dichotomous	HR	0.07967	PA ≥3 times per week	2	1	0.69	0.698832	0.45	0.460287	1.05	1.04785	0.14989	1740	USA	2006	Prospective cohort study	73.8 years	2	0	0	1	1	1	1	1	1	1	1	3	1	3	0	0	6.2	2	15	0	3	0	Grant Support: By the National Institute of Aging (grant AG06781). Potential Financial Conflicts of Interest: Grants received: L. Teri (National Institutes of Health).	1
Laurin 2001 (Light PA, Men)	PA < 3 times/wk	Low PA	Four categories	OR	0.0439189	PA <3 times per week	1	0	0.87	0.874996	0.26	0.268734	2.9	2.67664	0.614263	314	Canada	2001	Prospective cohort study	Not told from at least 65 years to over 85 years	2	0	0	1	1	0	1	1	1	1	1	3	0	3	1	1	5	2	9	0	2	0	The core study was funded by the Seniors' Independence Research Program, through the National Health Research and Development Program (NHRDP) of Health Canada (Project No. 6606-3954-MC [S]). Additional funding was provided by Pfizer Canada Inc through the Medical Research Council/Pharmaceutical Manufacturers Association of Canada Health Activity Program, NHRDP (Project No. 6603-1417-302 [R]), Bay…	2
Laurin 2001 (Moderate PA, Men)	PA < 3 times/wk	Low PA	Four categories	OR	0.0439189	PA ≥3 times per week at an intensity of walking	1	0		0.62		0.26		1.47	0.308673	679	Canada	2001	Prospective cohort study	Not told from at least 65 years to over 85 years	2	0	0	1	1	0	1	1	1	1	1	3	0	3	1	1	5	2	9	0	2	0	The core study was funded by the Seniors' Independence Research Program, through the National Health Research and Development Program (NHRDP) of Health Canada (Project No. 6606-3954-MC [S]). Additional funding was provided by Pfizer Canada Inc through the Medical Research Council/Pharmaceutical Manufacturers Association of Canada Health Activity Program, NHRDP (Project No. 6603-1417-302 [R]), Bay…	2
Laurin 2001 (High PA, Men)	PA < 3 times/wk	Low PA	Four categories	OR	0.0439189	PA ≥3 times per week at an intensity greater than walking	2	1		0.74		0.28		1.9	0.413265	532	Canada	2001	Prospective cohort study	Not told from at least 65 years to over 85 years	2	0	0	1	1	0	1	1	1	1	1	3	0	3	1	1	5	2	9	0	2	0	The core study was funded by the Seniors' Independence Research Program, through the National Health Research and Development Program (NHRDP) of Health Canada (Project No. 6606-3954-MC [S]). Additional funding was provided by Pfizer Canada Inc through the Medical Research Council/Pharmaceutical Manufacturers Association of Canada Health Activity Program, NHRDP (Project No. 6603-1417-302 [R]), Bay…	2
Laurin 2001 (Light PA, Women)	PA < 3 times/wk	Low PA	Four categories	OR	0.0439189	PA <3 times per week	1	0	0.7	0.709346	0.33	0.340005	1.49	1.45861	0.285359	586	Canada	2002	Prospective cohort study	Not told from at least 65 years to over 85 years	2	0	0	1	1	0	1	1	1	1	1	3	0	3	1	1	5	2	10	0	2	0	The core study was funded by the Seniors' Independence Research Program, through the National Health Research and Development Program (NHRDP) of Health Canada (Project No. 6606-3954-MC [S]). Additional funding was provided by Pfizer Canada Inc through the Medical Research Council/Pharmaceutical Manufacturers Association of Canada Health Activity Program, NHRDP (Project No. 6603-1417-302 [R]), Bay…	2
Laurin 2001 (Moderate PA, Women)	PA < 3 times/wk	Low PA	Four categories	OR	0.0439189	PA ≥3 times per week at an intensity of walking	1	0		0.87		0.52		1.45	0.237245	1127	Canada	2003	Prospective cohort study	Not told from at least 65 years to over 85 years	2	0	0	1	1	0	1	1	1	1	1	3	0	3	1	1	5	2	11	0	2	0	The core study was funded by the Seniors' Independence Research Program, through the National Health Research and Development Program (NHRDP) of Health Canada (Project No. 6606-3954-MC [S]). Additional funding was provided by Pfizer Canada Inc through the Medical Research Council/Pharmaceutical Manufacturers Association of Canada Health Activity Program, NHRDP (Project No. 6603-1417-302 [R]), Bay…	2
Laurin 2001 (High PA, Women)	PA < 3 times/wk	Low PA	Four categories	OR	0.0439189	PA ≥3 times per week at an intensity greater than walking	2	1		0.28		0.08		0.9	0.209184	609	Canada	2004	Prospective cohort study	Not told from at least 65 years to over 85 years	2	0	0	1	1	0	1	1	1	1	1	3	0	3	1	1	5	2	12	0	2	0	The core study was funded by the Seniors' Independence Research Program, through the National Health Research and Development Program (NHRDP) of Health Canada (Project No. 6606-3954-MC [S]). Additional funding was provided by Pfizer Canada Inc through the Medical Research Council/Pharmaceutical Manufacturers Association of Canada Health Activity Program, NHRDP (Project No. 6603-1417-302 [R]), Bay…	2
Li 2018			Continuous	HR	0.201	Standardized accelerometer-measured total daily activity		1	0.709	0.731767	0.562	0.589462	0.885	0.896086	0.106843	855	USA	2018	Prospective cohort study	81.0	3	0	0	1	1	0	0	1	1	0	1	3	0	0	0	0	11	2	4	0	2	1	The National Institutes of Health [grant numbers R01AG048108, R00HL102241, R01AG017917, and R01NS078009]. K.H. was also supported by P01AG009975. P.L. was also supported by the International Postdoctoral Exchange Fellowship [grant number 20150042] from the China Postdoctoral Council. F.A.J.L.S. was also funded in part by the National Institutes of Health [grant numbers R01DK099512, R01HL118601, R…	1
Luck 2014			Continuous	HR	0.07826	Number of physical activities	0	1	0.81	0.816217	0.69	0.69867	0.94	0.942271	0.0621431	2351	Germany	2014	Prospective cohort study	81.1 (SD 3.5) years	3	0	0	1	1	1	1	1	1	1	1	3	1	3	0	0	4.5	1	21	0	2	0	The study was funded by the German Federal Ministry of Education and Research (grants KND 01GI0102, 01GI0420, 01GI0422, 01GI0423, 01GI0429, 01GI0431, 01GI0433 and 01GI0434; and grants KNDD 01GI0710, 01GI0711, 01GI0712, 01GI0713, 01GI0714, 01GI0715, 01GI0716 and 01ET1006B). T. Luck was supported in writing the publication by a research fellowship from the German Research Foundation (grant: Lu 1730…	1
Najar 2019	Completely inactive, for example at most watching television and going to the movies	None	Dichotomous	HR	0.1194	Light physical activity for a minimum of 4 h/wk, such as walking, gardening, bowling, or cycling for half an hour a day, or regular physical training, such as running, tennis, or swimming, for at least 2–3 h/wk, or regular–intense physical training such as heavy exercise, for example running or swimming several times/week, or engaging in competitive sports.	1	1	0.91	0.915116	0.5	0.515889	1.64	1.5764	0.284951	779	Sweden	2019	Prospective cohort study	47.2	1	0	0	1	1	0	0	0	1	0	0	1	0	0	1	0	44	3	4	0	2	0	The study was supported by the Swedish Research Council (nos. 11267, 825-2007-7462, 825-2012-5041, 2013–8717, 2015–02830), Swedish Research Council for Health, Working Life and Welfare (nos. 2001–2646, 2001-28352003-0234, 2004-0150, 2006-0020, 2008-1229, 2012-1138, 2004-0145, 2006-0596, 2008-1111, 2010-0870, 2013-1202, AGECAP 2013–2300, 2013–2496, Epilife 2006-1506), the Swedish Alzheimer Foundat…	1
Ogino 2019	No leisure-time physical activity	None	Three categories, but result presented only for highest category	HR	0.0788	More than 1260 MET-minutes/2 weeks (equivalent to approximately 1.2/2.1/3.5 hours/week, or 10/18/30 minutes/day, of vigorous/moderate/light LTPA, respectively)	2	1	0.49	0.500257	0.22	0.227096	1.12	1.11458	0.405832	1076	USA	2019	Prospective cohort study	75.1	3	0	0	1	1	0	1	1	1	1	1	3	1	0	0	0	4.1	1	8	0	2	0	The work has been supported by the Washington Heights-Inwood Columbia Aging Project (WHICAP, PO1AG007232, R01AG037212, RF1AG054023, R00AG042483, R01AG059013) and funded by the National Institute on Aging (NIA) and by the National Center for Advancing Translational Sciences, National Institutes of Health through grant UL1TR001873.	1
Podewils 2005 (248-742 kcal/wk)	Lowest quartile (PA energy expenditure < 248 kcal/wk)	Low PA	Quartiles	HR	0.07259	PA energy expenditure (248 - 742 kcal/wk)	1	0	1.07	1.06722	0.73	0.737383	1.57	1.53717	0.204028	1013	USA	2005	Prospective cohort study	74.8 years (SD, range not given)	2	1	0	0	1	1	0	1	1	1	0	3	1	3	0	0	6	2	11	0	3	0	The research reported in this article was supported by contracts N01-HC-85079 through N01-HC-85086, N01-HC-35129, and N01-HC-15103 from the National Heart, Lung, and Blood Institute (NHLBI) and grant AG15928 from the National Institute on Aging.	1
Podewils 2005 (743 -1657 kcal/wk)	Lowest quartile (PA energy expenditure < 248 kcal/wk)	Low PA	Quartiles	HR	0.07259	PA energy expenditure (743 - 1657 kcal/wk)	2	0	0.92	0.922744	0.62	0.62885	1.39	1.37003	0.189075	1013	USA	2005	Prospective cohort study	74.8 years (SD, range not given)	2	1	0	0	1	1	0	1	1	1	0	3	1	3	0	0	6	2	11	0	3	0	The research reported in this article was supported by contracts N01-HC-85079 through N01-HC-85086, N01-HC-35129, and N01-HC-15103 from the National Heart, Lung, and Blood Institute (NHLBI) and grant AG15928 from the National Institute on Aging.	1
Podewils 2005 (> 1657 kcal/wk)	Lowest quartile (PA energy expenditure < 248 kcal/wk)	Low PA	Quartiles	HR	0.07259	PA energy ependiture (> 1657 kcal/wk)	2	1	0.7	0.707872	0.44	0.449297	1.13	1.12455	0.172259	1013	USA	2005	Prospective cohort study	74.8 years (SD, range not given)	2	1	0	0	1	1	0	1	1	1	0	3	1	3	0	0	6	2	11	0	3	0	The research reported in this article was supported by contracts N01-HC-85079 through N01-HC-85086, N01-HC-35129, and N01-HC-15103 from the National Heart, Lung, and Blood Institute (NHLBI) and grant AG15928 from the National Institute on Aging.	1
Rovio 2005	PA < 2 times/wk (duration 20-30min causing breathlessness and sweating)	Low PA	Dichotomous	OR	0.0387409	Leisure-time PA ≥ 2 times/wk (≥ 20-30min duration, causing breathlessness and sweating)	2	1		0.36		0.17		0.81	0.163265	1239	Finland	2005	Prospective cohort study	50,6 years (6,0 SD, range 39-64)	1	1	0	0	1	0	1	1	1	1	1	3	1	0	1	1	21	3	13	0	1	0	The study was supported by EVO 5772720 from Kuopio University Hospital, grant IIRG-04–1345 from Alzheimer Association, Academy of Finland grants 103334 and 206951, the Gamla Tjänarinnor Foundation, and the SADF (Insamligsstiftelsen för Alzheimer och Demensforskning).	1
Ravaglia 2008	Not meeting PA guidelines	Low PA	Dichotomous	HR	0.0720961	Meets PA guidelines	2	1	0.95	0.951757	0.5	0.509352	1.8	1.74784	0.31594	749	Italy	2008	Prospective cohort study	73.2 (SD 6.0) years	2	0	0	1	1	0	1	1	1	1	1	3	1	3	1	0	3.9	1	9	0	2	0	Supported by grants from the Italian Ministry of University and Scientific Research (basic-oriented research funds).	1
Sattler 2011	Sport activity < 1 time/wk or duration < 2h	Low PA	Dichotomous	OR	0.08	≥ one sport activity, for ≥ once a week for two hours	2	1		0.94		0.47		1.77	0.331633	300	Germany	2011	Prospective cohort study	74.3 (1.1 SD) years	2	0	0	1	0	0	0	1	1	0	1	3	0	3	0	0	12	2	4	0	3	0	The Interdisciplinary Longitudinal Study on Adult Development and Aging (ILSE) was supported by the “Research Program of the State of BadenWurttemberg” and the “Federal Ministry for Family", Senior Citizen, Women, and Youth, Germany”. The authors received additional support by the “Marsilius Kolleg”, center of advanced studies, University of Heidelberg, Germany.	1
Scarmeas 2009 (Much PA)	No PA (median 0 hours)	None	Three categories	HR	0.15	Much PA: median 1.3 hours of vigorous, 2.4 hours of moderate, or 4 hours of light PA per week	2	1	0.67	0.687792	0.47	0.490264	0.95	0.953765	0.11824	970	USA	2009	Prospective cohort study	77.2 (6.6 SD) years	2	0	0	1	1	1	1	1	1	1	1	3	1	3	0	0	5.4	2	15	0	2	0	The study was supported by National Institute on Aging grants AG028506 and P01-AG07232.	1
Scarmeas 2009 (Some PA)	No PA (median 0 hours)	None	Three categories	HR	0.15	Some PA: median 0.1 hours of vigorous, 0.8 hours of moderate, or 1.3 hours of light, or a combination thereof	1	0	0.75	0.765024	0.54	0.56013	1.04	1.03672	0.121579	970	USA	2009	Prospective cohort study	77.2 (6.6 SD) years	2	0	0	1	1	1	1	1	1	1	1	3	1	3	0	0	5.4	2	15	0	2	0	The study was supported by National Institute on Aging grants AG028506 and P01-AG07232.	1
Taaffe 2008 (High funtion:Moderate)	Lowest tertile	Low PA	Tertiles	HR	0.036677	PA score: second tertile (frequency, duration, intensity)	2	0	0.56	0.5646	0.17	0.172647	1.86	1.83062	0.422951	474	USA	2008	Prospective cohort study	mean 76,6 (range 71-92) years	2	0	0	1	1	1	1	1	1	1	1	3	1	3	1	0	6.1	2	13	0	2	0	This study was supported by contract N01-AG-4-2149 from the National Institute on Aging, contract N01-HC-05102 from the National Heart, Lung, and Blood Institute, and by the Japan Society for the Promotion of Science.	1
Taaffe 2008 (High function: High)	Lowest tertile	Low PA	Tertiles	HR	0.036677	PA score: highest tertile (frequency, duration, intensity)	2	1	1.57	1.5535	0.61	0.614439	4	3.78527	0.808885	474	USA	2008	Prospective cohort study	mean 76,6 (range 71-92) years	2	0	0	1	1	1	1	1	1	1	1	3	1	3	1	0	6.1	2	13	0	2	0	This study was supported by contract N01-AG-4-2149 from the National Institute on Aging, contract N01-HC-05102 from the National Heart, Lung, and Blood Institute, and by the Japan Society for the Promotion of Science.	1
Taaffe 2008 (Low function: High)	Lowest tertile	Low PA	Tertiles	HR	0.036677	PA score: highest tertile (frequency, duration, intensity)	2	1	0.57	0.574575	0.23	0.23332	1.42	1.40898	0.808885	268	USA	2008	Prospective cohort study	mean 76,6 (range 71-92) years	3	0	0	1	1	1	1	1	1	1	1	3	1	3	1	0	6.1	2	13	0	2	0	This study was supported by contract N01-AG-4-2149 from the National Institute on Aging, contract N01-HC-05102 from the National Heart, Lung, and Blood Institute, and by the Japan Society for the Promotion of Science.	1
Taaffe 2008 (Low function: Moderate)	Lowest tertile	Low PA	Tertiles	HR	0.036677	PA score: second tertile (frequency, duration, intensity)	2	0	0.43	0.434583	0.17	0.172647	1.09	1.08818	0.422951	268	USA	2008	Prospective cohort study	mean 76,6 (range 71-92) years	3	0	0	1	1	1	1	1	1	1	1	3	1	3	1	0	6.1	2	13	0	2	0	This study was supported by contract N01-AG-4-2149 from the National Institute on Aging, contract N01-HC-05102 from the National Heart, Lung, and Blood Institute, and by the Japan Society for the Promotion of Science.	1
Taaffe 2008 (Moderate function: High)	Lowest tertile	Low PA	Tertiles	HR	0.036677	PA score: highest tertile (frequency, duration, intensity)	2	1	0.49	0.494669	0.16	0.162522	1.48	1.46689	0.808885	345	USA	2008	Prospective cohort study	mean 76,6 (range 71-92) years	3	0	0	1	1	1	1	1	1	1	1	3	1	3	1	0	6.1	2	13	0	2	0	This study was supported by contract N01-AG-4-2149 from the National Institute on Aging, contract N01-HC-05102 from the National Heart, Lung, and Blood Institute, and by the Japan Society for the Promotion of Science.	1
Taaffe 2008 (Moderate function: Moderate)	Lowest tertile	Low PA	Tertiles	HR	0.036677	PA score: second tertile (frequency, duration, intensity)	2	0	1.03	1.02943	0.4	0.404489	2.63	2.55199	0.422951	345	USA	2008	Prospective cohort study	mean 76,6 (range 71-92) years	3	0	0	1	1	1	1	1	1	1	1	3	1	3	1	0	6.1	2	13	0	2	0	This study was supported by contract N01-AG-4-2149 from the National Institute on Aging, contract N01-HC-05102 from the National Heart, Lung, and Blood Institute, and by the Japan Society for the Promotion of Science.	1
Tan 2017	Lowest quintile	Low PA	Dichotomous	HR	0.05172	Quintiles 2-5	2	1	0.78	0.784534	0.55	0.556566	1.11	1.10679	0.135085	739	USA	2017	Prospective cohort study	70 (7 SD) years	3	0	0	1	1	0	1	1	1	1	0	3	1	3	0	0	22	3	14	0	3	0	The work was supported by the National Institutes of Health/National Heart, Lung, and Blood Institute Contract (NIH/NHLBI, HHSN268201500001I, N01-HC-25195, N01HV28178, R01HL093029, R01 HL131029 U01 HL096917, and 2K24HL04334) and training grant (T32-HL07224), the National Institute on Aging (NIA, R01 AG016495, AG008122, AG031287, AG047645), the National Institute of Neurological Disorders and Stro…	1
Verdelho 2012	< 30min duration or < 3 times/wk	Low PA	Dichotomous	HR	0.053292	≥ 30 min on ≥ 3 days in a week	2	1	1.09	1.08734	0.5	0.506845	2.37	2.28406	0.45337	638	Finland, Austria, Sweden, Italy, Switzerland, France, Portugal, Germany, the Netherlands, Denmark	2012	Prospective cohort study	74.1 (5 SD) years	2	0	0	1	1	1	0	1	1	0	0	3	0	3	0	0	3	1	6	0	3	0	The LADIS Study was supported by the European Union within the Vth European Framework Program Quality of life and management of living resources (1998–2002), contract No. QLRT-2000-00446.	1
Wilson 2002			Continuous	OR	1.00666	Total weekly hours of PA	0	1	1.04	1.0198	0.98	0.989949	1.1	1.04881	0.0150151	835	USA	2002	Prospective cohort study	76.0 (6.3 SD) years	2	0	0	1	1	0	0	0	1	1	1	3	1	3	1	0	4.1	1	4	0	3	0	Supported by grants AG-11101 and AG-10161 from the National Institute on Aging.	1
Yoshitake 1995	No daily LTPA or moderate/heavy PA at work	Low PA	Dichotomous	RR		Daily leisure-time exercise or moderate to severe PA at work	2	1		0.2		0.06		0.68	0.158163	826	Japan	1995	Prospective cohort study	74 years (range 65-98)	2	0	0	1	1	1	1	0	1	1	1	3	0	3	1	0	7	2	3	0	3	0	Supported in part by a grant from the Ministry of Education, Japan (No. 04670539), the Sasakawa Health Science Foundation, and the Univers Foundation.	1
																128261
Abbreviations:
MET = metabolic equivalent of energy expenditure
PA= physical activity
MVPA = moderate to vigorous physical activity
OR = odds ratio
HR= hazard ratio
RR= relative risk
h= hour
wk= week
min = minutes
LTPA = leisure-time physical activity
SD= standard deviation

## Sheet: Vascular dementia studies
Publication	Reference category	Reference category group	Physical activity measurement	Outcome type (OR= oods ratio, HR= hazard ratio, RR= relative risk)	Incidence rate of dementia	Exposure	Physical activity recommendation (1= does not meet, 2= meets, missing value = not applicable)	Highest group (1= highest physical activity group of the study, 0= not highest physical activity group of the study)	Original OR or HR	RR	Original Lower limit (Hr or OR)	Lower limit (RR)	Original Upper limit (HR or OR)	Upper limit (RR)	Sample size	Standard error (SE)	Country of origin	Publication year	Design	Age at baseline	Baseline age group (1=30-65 years, 2=70-85 years)	Only leisure PA (1= yes, 0=no)	Only work-related PA (1= yes, 0=no)	Both leisure and work-related PA (1= yes, 0=no)	Age used a covariate or included in the model or the cohort is a birth cohort (1= yes, 0=no)	Baseline cognition used as covariate (1= yes, 0= no)	Chronic disease used as a covariate (1= yes, 0=no)	Education used as a covariate or the cohort has the same education (1= yes, 0=no)	Gender used as a covariate (1= yes, 0=no)	Vascular risk factor used as a covariate (1=yes, 0=no)	Follow-up rate (1= ≥ 70%, 0= < 70% or not told)	Gender (0= men, 1= women, 3= men and women)	ApoE ε4 status used as a covariate (1= yes, 0=no)	Is gender interaction tested (0= no interaction, 1= yes interaction, 3= not told)	Participation rate (1= >70% or well designed case-control study or register study, 0= <70% or not told or volunteer recruit)	Separate results for genders (1=yes, 0=no)	Follow-up length	Follow-up length group (1= < 10 years, 2= ≥10 years)	Total number of covariates	Twin study (1= yes, 0=no)	Quality (1= high, 2= moderate, 3= poor)	Objective measure of physical activity (1= yes, 0=no)	Funding	Funding group (0= funding sources not told, 1= purely non-commercial funding sources, 2= funding also from commercial sources)
Gelber 2012	Three lower quartiles (the highest mean 7.2h light PA or 4.4h moderate PA per day)	Moderate PA	Dichotomous	OR	0.0224913	Highest quartile of light or moderate PA (mean 7.2 light PA/day or 4.4 of moderate activity)	2	1		0.57		0.34		0.93	3468	0.15051	USA	2012	Case-control study nested in prospective cohort study	52 years	1	0	0	1	1	0	1	1	1	1	1	0	1	3	1	0	25	2	9	0	1	0	The study was supported by a contract (N01-AG-4-2149) and grant (1-R01-AG17155-01A1) from the National Institute on Aging, a contract (N01-HC-05102) from the National Heart, Lung, and Blood Institute, and by the Office of Research and Development, Medical Research Service, Department of Veterans Affairs.	1
Hansson 2019 Malmö (intermediate tertile)	Lowest tertile	Low PA	Tertiles, continuous	HR	0.0145356	Second tertile of MET	1	0	0.93	0.930476	0.7	0.701536	1.24	1.23783	10323	0.136809	Sweden	2019	Prospective cohort study	median 57.5 (IQR 51.0–63.8)	1	1	0	0	1	0	1	1	1	1	1	3	0	3	1	0	median 15, IQR 14–17 years	2	12	0	3	0	The study was funded by the Strategic Research Area MultiPark (Multidisciplinary Research focused on and Parkinson’s disease and neurodegenerative disorders) at Lund University, the Swedish Alzheimer Foundation, the Swedish Brain Foundation, the European Research Council, the Swedish Research Council, the Knut and Alice Wallenberg Foundation, the Marianne and Marcus Wallenberg Foundation, Crafoor…	1
Hansson 2019 Malmö (high tertile)	Lowest tertile	Low PA	Tertiles, continuous	HR	0.0145356	Highest tertile of MET	2	1	0.66	0.661642	0.49	0.49183	0.9	0.900658	10316	0.104293	Sweden	2019	Prospective cohort study	median 57.5 (IQR 51.0–63.8)	1	1	0	0	1	0	1	1	1	1	1	3	0	3	1	0	median 15, IQR 14–17 years	2	12	0	3	0	The study was funded by the Strategic Research Area MultiPark (Multidisciplinary Research focused on and Parkinson’s disease and neurodegenerative disorders) at Lund University, the Swedish Alzheimer Foundation, the Swedish Brain Foundation, the European Research Council, the Swedish Research Council, the Knut and Alice Wallenberg Foundation, the Marianne and Marcus Wallenberg Foundation, Crafoor…	1
Laurin 2001 (Low PA)	PA < 3 times/wk	None	Four categories	OR	0.0144656	PA < 3 times/wk	1	0	0.5	0.503643	0.2	0.202342	1.44	1.43089	865	0.313406	Canada	2001	Prospective cohort study	Not told from at least 65 years to over 85 years	2	0	0	1	1	0	1	1	1	1	1	3	0	3	1	0	5 years	1	3	0	2	0	The core study was funded by the Seniors' Independence Research Program, through the National Health Research and Development Program (NHRDP) of Health Canada (Project No. 6606-3954-MC [S]). Additional funding was provided by Pfizer Canada Inc through the Medical Research Council/Pharmaceutical Manufacturers Association of Canada Health Activity Program, NHRDP (Project No. 6603-1417-302 [R]), Bay…	2
Laurin 2001 (Moderate PA)	PA < 3 times/wk	None	Four categories	OR	0.0144656	PA ≥3 times per week at an intensity of walking	1	0		0.7		0.37		1.31	1753	0.239796	Canada	2001	Prospective cohort study	Not told from at least 65 years to over 85 years	2	0	0	1	1	0	1	1	1	1	1	3	0	3	1	0	5 years	1	3	0	2	0	The core study was funded by the Seniors' Independence Research Program, through the National Health Research and Development Program (NHRDP) of Health Canada (Project No. 6606-3954-MC [S]). Additional funding was provided by Pfizer Canada Inc through the Medical Research Council/Pharmaceutical Manufacturers Association of Canada Health Activity Program, NHRDP (Project No. 6603-1417-302 [R]), Bay…	2
Laurin 2001 (High PA)	PA < 3 times/wk	None	Four categories	OR	0.0144656	PA ≥3 times per week at an intensity greater than walking	2	1		0.63		0.27		1.43	1114	0.295918	Canada	2001	Prospective cohort study	Not told from at least 65 years to over 85 years	2	0	0	1	1	0	1	1	1	1	1	3	0	3	1	0	5 years	1	3	0	2	0	The core study was funded by the Seniors' Independence Research Program, through the National Health Research and Development Program (NHRDP) of Health Canada (Project No. 6606-3954-MC [S]). Additional funding was provided by Pfizer Canada Inc through the Medical Research Council/Pharmaceutical Manufacturers Association of Canada Health Activity Program, NHRDP (Project No. 6603-1417-302 [R]), Bay…	2
Najar 2019	Completely inactive, for example at most watching television and going to the movies	None	Dichotomous	HR	0.032	Light physical activity for a minimum of 4 h/wk, such as walking, gardening, bowling, or cycling for half an hour a day, or regular physical training, such as running, tennis, or swimming, for at least 2–3 h/wk, or regular–intense physical training such as heavy exercise, for example running or swimming several times/week, or engaging in competitive sports.	1	1	0.87	0.871832	0.29	0.293356	2.56	2.49649	779	0.555582	Sweden	2019	Prospective cohort study	47.2	1	0	0	1	1	0	1	0	1	1	0	1	0	0	1	0	44	2	4	0	2	0	The study was supported by the Swedish Research Council (nos. 11267, 825-2007-7462, 825-2012-5041, 2013–8717, 2015–02830), Swedish Research Council for Health, Working Life and Welfare (nos. 2001–2646, 2001-28352003-0234, 2004-0150, 2006-0020, 2008-1229, 2012-1138, 2004-0145, 2006-0596, 2008-1111, 2010-0870, 2013-1202, AGECAP 2013–2300, 2013–2496, Epilife 2006-1506), the Swedish Alzheimer Foundat…	1
Podewils 2005 (743 - 1657 kcal/wk)	Lowest quartile (PA energy expenditure < 248 kcal/wk)	Low PA	Quartiles	HR	0.063407	PA energy expenditure (248 -742 kcal/wk)	1	0	1.32	1.30641	0.89	0.893179	1.96	1.9003	1013	0.256917	USA	2005	Prospective cohort study	74.8 years (SD, range not given)	2	1	0	0	1	1	0	1	1	1	0	3	1	3	0	0	median 6 years, range 0.03 -8.4 years	1	11	0	3	0	The research reported in this article was supported by contracts N01-HC-85079 through N01-HC-85086, N01-HC-35129, and N01-HC-15103 from the National Heart, Lung, and Blood Institute (NHLBI) and grant AG15928 from the National Institute on Aging.	1
Podewils 2005 (743 - 1657 kcal/wk)	Lowest quartile (PA energy expenditure < 248 kcal/wk)	Low PA	Quartiles	HR	0.063407	PA energy expenditure (743 - 1657 kcal/wk)	2	0	0.99	0.990321	0.63	0.637612	1.57	1.54136	1013	0.230549	USA	2005	Prospective cohort study	74.8 years (SD, range not given)	2	1	0	0	1	1	0	1	1	1	0	3	1	3	0	0	median 6 years, range 0.03 -8.4 years	1	11	0	3	0	The research reported in this article was supported by contracts N01-HC-85079 through N01-HC-85086, N01-HC-35129, and N01-HC-15103 from the National Heart, Lung, and Blood Institute (NHLBI) and grant AG15928 from the National Institute on Aging.	1
Podewils 2005 (> 1657 kcal/wk)	Lowest quartile (PA energy expenditure < 248 kcal/wk)	Low PA	Quartiles	HR	0.063407	PA energy expenditure (> 1657 kcal/wk)	2	1	1.03	1.029	0.64	0.647523	1.67	1.63427	1013	0.251722	USA	2005	Prospective cohort study	74.8 years (SD, range not given)	2	1	0	0	1	1	0	1	1	1	0	3	1	3	0	0	median 6 years, range 0.03 -8.4 years	1	11	0	3	0	The research reported in this article was supported by contracts N01-HC-85079 through N01-HC-85086, N01-HC-35129, and N01-HC-15103 from the National Heart, Lung, and Blood Institute (NHLBI) and grant AG15928 from the National Institute on Aging.	1
Ravaglia 2008	Not adhering PA guidelines	Low PA	Dichotomous	HR	0.036	Adhering PA guidelines	2	1	0.53	0.534565	0.23	0.233257	1.23	1.22486	749	0.25296	Italy	2008	Prospective cohort study	73.2 (SD 6.0) years	2	0	0	1	1	0	1	1	1	0	1	3	1	3	1	0	3.9 (SD 0.7) years	1	9	0	2	0	Supported by grants from the Italian Ministry of University and Scientific Research (basic-oriented research funds).	1
Verdelho 2012	< 30min duration or < 3 times/wk	Low PA	Dichotomous	HR	0.084639	≥ 30 min on ≥ 3 days in a week	2	1	0.42	0.430795	0.22	0.22765	0.8	0.807012	638	0.147796	Finland, Austria, Sweden, Italy, Switzerland, France, Portugal, Germany, the Netherlands, Denmark	2012	Prospective cohort study	74.1 (5 SD) years	2	0	0	1	1	1	0	1	1	0	0	3	0	3	0	0	max. 3 years (mean not told)	1	6	0	3	0	The LADIS Study was supported by the European Union within the Vth European Framework Program Quality of life and management of living resources (1998–2002), contract No. QLRT-2000-00446.	1
Yoshitake 1995	No daily LTPA or moderate to heavy PA at work	Low PA	Dichotomous	RR		Daily leisure-time exercise or moderate to severe PA at work	2	1		0.81		0.42		1.57	826	0.293367	Japan	1995	Prospective cohort study	74 years (range 65-98)	2	0	0	1	1	1	1	0	1	1	1	3	0	3	1	0	7 years	1	0	0	3	0	Supported in part by a grant from the Ministry of Education, Japan (No. 04670539), the Sasakawa Health Science Foundation, and the Univers Foundation.	1
															33870
Abbreviations:
MET = metabolic equivalent of energy expenditure
PA= physical activity
MVPA = moderate to vigorous physical activity
RR= relative risk
OR = odds ratio
HR= hazard ratio
h= hour
wk= week
min = minutes
LTPA = leisure-time physical activity
SD= standard deviation

## Sheet: Work-related physical activity
Publication	Estimate of association between PA and dementia	Estimate of association	Dementia incidence	Exposure	OR	RR	Original Lower limit 95% (HR or OR)	Lower limit of RR	Original Upper limit 95% (HR or OR)	Upper limit of RR	N size	Country of origin	Publication year	Design	Age at baseline	Only leisure PA (1=Yes, 0=No)	Only work-related PA (1=Yes, 0=No)	Both leisure and work-related PA (1=Yes, 0=No)	Confounder age (Yes =1, No=0)	Adjustment for cognition at baseline (Yes=1, No=0)	Confounder chronic diseases (Yes=1, No=0)	Confounder: education (Yes=1, No=0)	Confounder: gender or only one gender in the analyses (Yes=1, No=0)	Confounder: other vascular risk factors (smoking, heavy drinking, obesity, cholesterol, body mass index, cardiovascular disease) (Yes=1, No=0)	Follow-up rate (1= ≥ 70%, 0= < 70% or not told)	Genders of the cohort (3= Men and women, 1= Men)	Adjusted for ApoE ε4 allele (Yes=1, No=0)	Participation rate (1= >70% or well designed case-control study or register study, 0= <70% or not told or volunteer recruit)	The follow-up length (years)	The number of adjusted confounders	Quality score (good=1,moderate=2, poor=3)	Objective measure of PA
Rovio 2007	Sedentary work	OR	0.038128	Physical work	1.45	1.42554	0.66	0.668668	3.17	2.92776	1158	Finland	2007	Prospective cohort study	50.4 (6.0 SD) years	0	1	0	1	0	1	1	1	1	1	3	1	1	21	17	2	0
Nabe-Nielsen 2021 (Light)	Mainly sedentary	RR	0.148	Light physical work		1.1		0.9		1.34	2027	Denmark	2021	Prospective cohort study	48.9	0	1	0	1	0	0	0	1	1	1	1	0	1	29.3	11	2	0
Nabe-Nielsen 2021 (Vigorous)	Mainly sedentary	RR	0.148	Heavy physical work		1.55		1.08		2.24	703	Denmark	2021	Prospective cohort study	48.9	0	1	0	1	0	0	0	1	1	1	1	0	1	29.3	11	2	0
Abbreviations:
MET = metabolic equivalent of energy expenditure
PA= physical activity
MVPA = moderate to vigorous physical activity
RR= relative risk
OR = odds ratio
HR= hazard ratio
h= hour
wk= week
min = minutes
LTPA = leisure-time physical activity
SD= standard deviation

## Sheet: Quality assessment
Study Id	Reviewer	Selection	Performance quality	Baseline cognition	Comparability	Assessment of outcome	Was follow-up long enough	Follow-up adequacy	Overall quality
AbellanvanKan 2012	KW	no star	half a star	one star	no star	one star	no star	no star	Poor quality
AbellanvanKan 2012	PIM	No star	one star	one star	no star	one star	no star	no star	Poor Quality
AbellanvanKan 2012	Consensus									Poor quality
Andel 2008	PIM	one star	half a star	one star	one star	one star	one star	one star	Good quality
Andel 2008	KW	no star	no star	one star	one star	one star	one star	one star	poor quality
Andel 2008	Consensus									Moderate quality
Annweiler 2012	PIM	no star	half a star	no star	one star	one star	no star	no star	Poor quality
Annweiler 2012	KW	no star	no star	no star	one star	one star	no star	no star	Poor quality
Annweiler 2012	Consensus									Poor quality
Blasko 2014	KW	no star	no star	no star	no star	star	no star	no star	Poor Quality
Blasko 2014	PIM	no star	no star	no star	half a star	one star	no star	one star	Poor quality
Blasko 2014	Consensus									Poor quality
Buchman 2012	KW	half a star	one star	no star	no star	one star	no star	one star	poor quality
Buchman 2012	PIM	no star	one star	one star	half a star	one star	no star	one star	Moderate quality
Buchman 2012	Consensus									Poor quality (cognition), Moderate quality (Alzheimer)
Carlson 2008	PIM	one star	no star	one star	no star	one star	one star	one star	Poor quality
Carlson 2008	KW	no star	half a star	one star	no star	one star	one star	one star	Poor quality
Carlson 2008	Consensus									Poor quality
Chang 2010	KW	half a star	half a star	one star	one star	one star	one star	one star	moderate qiality
Chang 2010	PIM	half a star	half a star	one star	one star	one star	one star	no star	Moderate quality
Chang 2010	Consensus									Moderate quality
deBruijn 2013	KW	one star	one star	no star	one star	one star	no star	one star	moderate quality
deBruijn 2013	PIM	one star	one star	one star	one star	one star	one star	one star	Good quality
deBruijn 2013	Consensus									Moderate quality
Dupré 2020	KW	no star	one star	no star	half a star	one star	no star	one star	Poor quality
Dupré 2020	PIM	no star	one star	one star	half a star	one star	no star	one star	Moderate quality
Dupré 2020	Consensus									Poor quality
Elwood 2013	KW	one star	half a star	one star	half a star	one star	one star	one star	Moderate quality
Elwood 2013	PIM	one star	no star	one star	half a star	one star	one star	no star	Moderate quality
Elwood 2013	Consensus									Moderate quality
Gelber 2012	KW	one star	one star	one star	one star	one star	one star	one star	Good quality
Gelber 2012	PIM	one star	half a star	one star	one star	one star	one star	one star	Good quality
Gelber 2012	Consensus									Good quality
Grasset 2017	KW	no star	no star	no star	one star	one star	one star	one star	poor quality
Grasset 2017	PIM	no star	no star	one star	one star	one star	one star	no star	Poor quality
Grasset 2017	Consensus									Poor quality
Gross 2017	KW	no star	one star	one star	one star	one star	one star	no star	moderate quality
Gross 2017	PIM	no star	one star	one star	one star	one star	one star	no star	Moderate quality
Gross 2017	Consensus									Moderate quality
Gureje 2011	KW	one star	one star	no star	half a star	no star	no star	no star	poor quality
Gureje 2011	PIM	half a star	one star	one star	half a star	one star	one star	no star	Moderate quality
Gureje 2011	Consensus									Poor quality
Hansson 2019 Vasaloppet	PIM	one star	one star	one star	one star	half a star	one star	one star	Good quality
Hansson 2019 Vasaloppet	KW	one star	no star	one star	half a star	half a star	one star	one star	Moderate quality
Hansson 2019 Vasaloppet	Consensus									Moderate quality
Hansson 2019 Malmö	PIM	no star	one star	no star	one star	half a star	one star	one star	Poor quality
Hansson 2019 Malmö	KW	half a star	one star	no star	half a star	half a star	one star	one star	Poor quality
Hansson 2019 Malmö	Consensus									Poor quality
Hessler 2016	KW	no star	no star	one star	half a star	half a star	no star	one star	Poor quality
Hessler 2016	PIM	no star	half a star	no star	half a star	half a star	no star	one star	Poor quality
Hessler 2016	Consensus									Poor quality
Kim 2011	KW	no star	no star	no star	half a star	one star	no star	one star	poor quality
Kim 2011	PIM	no star	no star	no star	half a star	one star	no star	one star	Poor quality
Kim 2011	Consensus									Poor quality
Krell-Roesch 2016	KW	one star	half a star	one star	one star	one star	no star	one star	Moderate quality
Krell-Roesch 2016	PIM	no star	half a star	one star	half a star	one star	no star	one star	Poor quality
Krell-Roesch 2016	Consensus									Moderate quality
Larson 2006	KW	no star	half a star	one star	half a star	one star	no star	one star	poor quality
Larson 2006	PIM	no star	half a star	one star	one star	one star	no star	one star	Poor quality
Larson 2006	Consensus									Poor quality
Laurin 2001	KW	one star	half a star	one star	half a star	one star	no star	one star	moderate quality
Laurin 2001	PIM	one star	half a star	one star	half a star	one star	no star	one star	Moderate quality
Laurin 2001	Consensus									Moderate quality
Lee 2015 J Am Med	KW	one star	half a star	one star	one star	one star	no star	one star	Moderate quality
Lee 2015 J Am Med	PIM	No star	half a star	one star	one star	one star	no star	one star	poor quality
Lee 2015 J Am Med	Consensus									Poor quality
Lipnicki 2017	KW	no star	no star	one star	half a star	one star	no star	no star	poor quality
Lipnicki 2017	PIM	no star	no star	one star	half a star	one star	no star	no star	Poor quality
Lipnicki 2017	Consensus									Poor quality
Llamas-Velasco 2015	KW	one star	half a star	one star	one star	one star	no star	no star	poor quality
Llamas-Velasco 2015	PIM	one star	half a star	one star	half a star	one star	no star	one star	Moderate quality
Llamas-Velasco 2015	Consensus									Poor quality
Luck 2014	KW	half a star	half a star	one star	one star	one star	no star	one star	modetare quality
Luck 2014	PIM	no star	no star	one star	one star	one star	no star	one star	Poor quality
Luck 2014	Consensus									Moderate quality
Mehlig 2014	KW	one star	no star	one star	one star	one star	one star	one star	moderate quality
Mehlig 2014	PIM	one star	half a star	one star	one star	one star	one star	one star	Good quality
Mehlig 2014	Consensus									Moderate quality
Niti 2008	KW	one star	no star	no star	one star	one star	no star	no star	poor quality
Niti 2008	PIM	no star	no star	no star	one star	one star	no star	no star	Poor quality
Niti 2008	Consensus									Poor quality
Paganini-Hill 2016	KW	half a star	half a star	one star	half a star	one star	no star	one star	moderate quality
Paganini-Hill 2016	PIM	no star	half a star	one star	half a star	one star	no star	no star	Poor quality
Paganini-Hill 2016	Consensus									Moderate quality
Podewils 2005	KW	no star	one star	one star	half a star	one star	no star	no star	no star
Podewils 2005	PIM	no star	one star	one star	one star	one star	no star	no star	Poor quality
Podewils 2005	Consensus									Poor quality
Ravaglia 2008	KW	one star	one star	one star	one star	one star	no star	one star	Moderate quality
Ravaglia 2008	PIM	no star	one star	one star	half a star	one star	no star	one star	Moderate quality
Ravaglia 2008	Consensus									Moderate quality
Rovio 2005	KW	one star	half a star	one star	one star	one star	one star	one star	good quality
Rovio 2005	PIM	one star	one star	one star	one star	one star	one star	one star	Good quality
Rovio 2005	Consensus									Good quality
Sabia 2017	KW	one star	one star	one star	one star	one star	one star	one star	good quality
Sabia 2017	PIM	no star	one star	Dementia analyses: one star Cognition analyses: no star	Dementia analyses: one star cognition analyses: half a star	one star (for cognition analyses) half a star (for dementia analyses)	one star	no star	Cognition analyses: Poor quality Dementia analyses: Poor quality
Sabia 2017	Consensus									Dementia analyses: Good quality, Cognition analyses: Poor quality
Sattler 2011	KW	no star	half a star	no star	no star	one star	one star	one star	poor quality
Sattler 2011	PIM	no star	half a star	one star	no star	one star	one star	one star	Poor quality
Sattler 2011	Consensus									Poor quality
Scarmeas 2009	KW	half a star	one star	one star	half a star	one star	one star	no star	Moderate quality
Scarmeas 2009	PIM	no star	one star	one star	one star	one star	no star	one star	Moderate quality
Scarmeas 2009	Consensus									Moderate quality
Schuit 2001	KW	no star	half a star	no star	one star	one star	no star	no star	poor quality
Schuit 2001	PIM	no star	half a star	no star	one star	one star	no star	no star	Poor quality
Schuit 2001	Consensus									Poor quality
Shaaban 2019	KW	no star	half a star	no star	half a star	one star	no star	one star	Poor quality
Shaaban 2019	PIM	no star	half a star	one star	no star	one star	no star	no star	Poor quality
Shaaban 2019	Consensus									Poor quality
Shih 2017	KW	one star	one star	one star	one star	one star	no star	one star	moderate quality
Shih 2017	PIM	no star	one star	one star	half a star	one star	no star	no star	Poor quality
Shih 2017	Consensus									Moderate quality
Simons 2006	KW	one star	no star	one star	half a star	one star	one star	no star	moderate quality
Simons 2006	PIM	no star	half a star	one star	half a star	half a star	one star	no star	Poor quality
Simons 2006	Consensus									Poor quality
Soni 2017	KW	half a star	one star	one star	one star	no star	one star	no star	poor quality
Soni 2017	PIM	half a star	half a star	no star	one star	no star	one star	no star	Poor quality
Soni 2017	Consensus									Poor quality
Stephan 2017	KW	no star	half a star	one star	one star	one star	no star	one star	poor quality
Stephan 2017	PIM	no star	half a star	one star	one star	one star	no star	one star	Poor quality
Stephan 2017	Consensus									Poor quality
Taaffe 2008	KW	one star	one star	one star	one star	one star	no star	one star	moderate quality
Taaffe 2008	PIM	one star	one star	one star	one star	one star	no star	one star	Moderate quality
Taaffe 2008	Consensus									Moderate quality
Tan 2017	KW	no star	one star	one star	half a star	one star	no star	no star	Poor quality
Tan 2017	PIM	no star	one star	one star	one star	one star	one star (supplementary analysis)	no star	Poor quality
Tan 2017	Consensus									Poor quality
Tolppanen 2015	KW	one star	one star	one star	one star	half a star	one star	one star	good quality
Tolppanen 2015	PIM	one star	one star	one star	one star	CAIDE target population: half a star CAIDE participants: one star	one star	one star	Good quality
Tolppanen 2015	Consensus									Good quality
Vaillant 2014	KW	no star	one star	one star	no star	one star	one star	one star	poor quality
Vaillant 2014	PIM	no star	one star	one star	no star	one star	one star	one star	Poor quality
Vaillant 2014	Consensus									Poor quality
Verdelho 2012	KW	no star	half a star	no star	half a star	one star	no star	no star	poor quality
Verdelho 2012	PIM	no star	no star	no star	half a star	one star	no star	no star	Poor quality
Verdelho 2012	Consensus									Poor quality
Verghese 2003	KW	no star	no star	no star	one star	one star	no star	one star	poor quality
Verghese 2003	PIM	no star	no star	one star	half a star	one star	no star	no star	Poor quality
Verghese 2003	Consensus									Poor quality
Wang 2002	KW	no star	no star	one star	half star	one star	no star	no star	poor quality
Wang 2002	PIM	no star	half a star	one star	half a star	one star	no star	no star	Poor quality
Wang 2002	Consensus									Poor quality
Wang 2014	KW	no star	no star	no star	one star	one star	no star	one star	poor quality
Wang 2014	PIM	no star	half a star	no star	one star	one star	no star	no star	Poor quality
Wang 2014	Consensus									Poor quality
Wilson 2002	KW	one star	half a star	one star	half a star	one star	no star	no star	poor quality
Wilson 2002	PIM	no star	one star	one star	no star	one star	no star	no star	Poor quality
Wilson 2002	Consensus									Poor quality
Yoshitake 1995	KW	half a star	no star	no star	half a star	one star	no star	one star	poor quality
Yoshitake 1995	PIM	no star	half a star	no star	no star	one star	no star	one star	Poor quality
Yoshitake 1995	Consensus									Poor quality
Zotcheva 2018	KW	one star	half a star	no star	no star	half a star	one star	one star	Poor quality
Zotcheva 2018	PIM	one star	half a star	one star	one star	half a star	one star	one star	Good quality
Zotcheva 2018	Consensus									Poor quality
Still Working (Kivimäki 2019)	PIM	no star	no star	one star	half a star	half a star	one star	one star	Poor quality
Still Working (Kivimäki 2019)	KW	one star	no star	one star	one star	half a star	one star	one star	Moderate quality
Still Working (Kivimäki 2019)	Consensus									Moderate quality
HeSSup (Kivimäki 2019)	PIM	no star	no star	one star	one star	half a star	one star	one star	Poor quality
HeSSup (Kivimäki 2019)	KW	no star	half a star	one star	one star	half a star	one star	one star	Poor quality
HeSSup (Kivimäki 2019)	Consensus									Poor quality
FPS (Kivimäki 2019)	PIM	no star	one star	one star	one star	half a star	one star	one star	Moderate quality
FPS (Kivimäki 2019)	KW	half a star	one star	one star	one star	half a star	one star	one star	Good quality
FPS (Kivimäki 2019)	Consensus									Good quality
WOLF N (Kivimäki 2019)	PIM	one star	no star	one star	one star	half a star	one star	one star	Moderate quality
WOLF N (Kivimäki 2019)	KW	no star	no star	one star	one star	half a star	one star	one star	Poor quality
WOLF N (Kivimäki 2019)	Consensus	one star								Moderate quality
Shih 2018	PIM	one star	one star	no star	half a star	one star	no star	one star	Moderate
Shih 2018	JP	half a star	half a star	one star	half a star	one star	no star	one star	Moderate
Shih 2018	Consensus									Moderate quality
Palta 2019	PIM	no star	one star	no star	half a star	half a star	one star	one star	Poor quality
Palta 2019	JP	one star	one star	no star	half a star	one star	one star	no star	Moderate
Palta 2019	Consensus									Poor quality
Sutin 2019	PIM	no star	no star	no star	half a star	one star	no star	one star	Poor quality
Sutin 2019	JP	one star	half a star	one star	half a star	one star	no star	one star	Moderate
Sutin 2019	Consensus									Poor quality
Deckers 2018	PIM	one star	no star	no star	half a star	one star	one star	one star	Poor quality
Deckers 2018	JP	one star	no star	no star	half a star	one star	one star	one star	Poor quality
Deckers 2018	Consensus									Poor quality
Ogino 2019	PIM	no star	one star	one star	half a star	one star	no star	one star	Moderate
Ogino 2019	JP	no star	one star	one star	one star	one star	no star	no star	Poor quality
Ogino 2019	Consensus									Moderate quality
Lin 2019	PIM	one star	one star	one star	no star	one star	no star	no star	Poor quality
Lin 2019	JP	half a star	no star	one star	half a star	one star	no star	no star	Poor quality
Lin 2019	Consensus									Poor quality
Wu 2020	PIM	half a star	one star	no star	half a star	one star	no star	no star	Poor quality
Wu 2020	JP	one star	half a star	one star	half a star	one star	no star	one star	Moderate quality
Wu 2020	Consensus									Poor quality
Najar 2019	PIM	no star	one star	one star	All-cause dementia: half a star, Alzheimer's disease: no star, Vascular dementia: half a star	one star	one star	no star	All-cause dementia: Moderate, Alzheimer's disease: Poor, Vascular dementia: Moderate
Najar 2019	JP	one star	one star	one star	one star	one star	one star	one star	Good quality
Najar 2019	Consensus									All-cause dementia: Moderate quality, Alzheimer's disease: Poor quality, Vascular dementia: Moderate quality
Beauchet 2021	PIM	no star	one star	one star	no star	one star	no star	one star	Poor quality
Beauchet 2021	JP	no star	one star	one star	no star	no star	no star	no star	poor quality
Beauchet 2021	Consensus									Poor quality
Peeters 2020	PIM	one star	no star	no star	half a star	one star	no star	no star	Poor quality
Peeters 2020	JP	half a star	no star	one star	half a star	one star	no star	one star	Poor quality
Peeters 2020	Consensus									Poor quality
Li 2018	PIM	no star	one star	one star	half a star	one star	one star	one star	Poor quality
Li 2018	JP	no star	one star	one star	half a star	one star	one star	one star	Moderate quality
Li 2018	Consensus									Moderate quality
Nabe-Nielsen 2021	PIM	one star	half a star	one star	half a star	half a star	one star	one star	Moderate quality
Nabe-Nielsen 2021	JP	half a star	no star	one star	half a star	half a star	one star	one star	Poor quality
Nabe-Nielsen 2021	Consensus									Moderate quality
Kunutsor 2021	PIM	one star	one star	one star	half a star	half a star	one star	one star	Moderate quality
Kunutsor 2021	JP	one star	one star	one star	half a star	one star	one star	one star	Moderate quality
Kunutsor 2021	Consensus									Moderate quality

## Sheet: Dose-response_ACD_AllStudies
id	exposure	cases	n	logrr	se	rr	lrr	urr	type	dose
Ande2008	52	49	352	0	0	1	NA	NA	ir	52
Ande2008	350	188	2231	-0.430372	0.180628	0.650267	0.451688	0.916952	ir	350
Ande2008	600	8	296	-1.02165	0.375217	0.36	0.17	0.74	ir	600
Ande2008	1200	27	255	-0.328504	0.272028	0.72	0.42	1.22	ir	1200
Dupr2020	0	27	507	0	0	1	NA	NA	ir	0
Dupr2020	500	30	507	0.109749	0.237512	1.116	0.696424	1.76694	ir	500
Dupr2020	1400	32	507	0.151934	0.336175	1.16408	0.597279	2.23097	ir	1400
Hans2019	672	455	6882	0	0	1	NA	NA	ir	672
Hans2019	1330	460	6882	0.00960959	0.0701423	0.97	0.85	1.11	ir	1330
Hans2019	2332	460	6875	-0.0394586	0.0694988	0.9	0.79	1.03	ir	2332
Kunu2020	138	73	798	0	0	1	NA	NA	ir	138
Kunu2020	528	62	798	-0.144549	0.165859	0.865413	0.620776	1.18932	ir	528
Kunu2020	5040	73	798	-0.0390308	0.161898	0.961721	0.699665	1.31981	ir	5040
Laur001M	0	30	423	0	0	1	NA	NA	ir	0
Laur001M	158	12	181	-0.0383487	0.417854	0.962377	0.415392	2.13711	ir	158
Laur001M	630	33	558	-0.314711	0.310305	0.73	0.4	1.35	ir	630
Laur001M	1080	19	405	-0.0833816	0.333905	0.92	0.47	1.74	ir	1080
Laur001W	0	80	790	0	0	1	NA	NA	ir	0
Laur001W	158	16	332	-0.438921	0.332744	0.644732	0.334027	1.23099	ir	158
Laur001W	630	46	881	-0.127833	0.221838	0.88	0.57	1.36	ir	630
Laur001W	1080	12	357	-0.562119	0.388017	0.57	0.26	1.19	ir	1080
Pode2005	93	129	578	0	0	1	NA	NA	ir	93
Pode2005	371	136	853	0.182454	0.125725	1.20016	0.934883	1.53037	ir	371
Pode2005	900	111	776	-0.0573872	0.146379	0.944228	0.706241	1.25359	ir	900
Pode2005	1680	103	804	-0.151285	0.159384	0.859603	0.628137	1.17326	ir	1680
Chan2010	0	145	3413	0	0	1	NA	NA	ir	0
Chan2010	600	32	1309	-0.510826	0.194838	0.6	0.41	0.88	ir	600
Chan2010	1800	7	223	-0.261365	0.386111	0.77	0.35	1.59	ir	1800
Gure2011	180	31	408	0	0	1	NA	NA	ir	180
Gure2011	930	32	408	0	0.484466	1	0.386914	2.26433	ir	930
Gure2011	3000	22	408	-0.371064	0.534596	0.69	0.23	1.87	ir	3000
Hess2016	0	81	491	0	0	1	NA	NA	ir	0
Hess2016	720	126	1384	-0.316524	0.135051	0.728678	0.560706	0.952031	ir	720
Hess2016	1920	89	1672	-0.578559	0.159793	0.560706	0.410426	0.767842	ir	1920
Llam2015	0	59	790	0	0	1	NA	NA	ir	0
Llam2015	245	35	865	-0.624559	0.221889	0.535498	0.344966	0.823244	ir	245
Llam2015	490	23	681	-0.786428	0.261255	0.455469	0.274367	0.764012	ir	490
Llam2015	980	17	769	-1.22227	0.298655	0.29456	0.162982	0.525509	ir	980
Nabe2021	150	59	469	0	0	1	NA	NA	ir	150
Nabe2021	960	301	1964	-0.223144	0.149946	0.8	0.6	1.08	ir	960
Nabe2021	1920	41	297	-0.356675	0.212959	0.7	0.46	1.06	ir	1920
Palt2019	0	379	3590	0	0	1	NA	NA	ir	0
Palt2019	304	235	2372	-0.121681	0.0795973	0.885431	0.759687	1.03787	ir	304
Palt2019	890	233	2372	-0.24956	0.0824243	0.779143	0.661794	0.914208	ir	890
Palt2019	3106	216	2371	-0.314127	0.0843389	0.730426	0.62235	0.866197	ir	3106
Peet2020	195	60	440	0	0	1	NA	NA	ir	195
Peet2020	857	81	858	-0.573237	0.234997	0.563698	0.352565	0.88574	ir	857
Peet2020	1439	27	542	-0.725985	0.255794	0.483848	0.250271	0.682156	ir	1439
Soni2017	60	76	1123	0	0	1	NA	NA	ir	60
Soni2017	120	83	1653	-0.410074	0.161473	0.663601	0.453981	0.960614	ir	120
Soni2017	180	60	1630	-0.366103	0.180137	0.693432	0.463995	1.03934	ir	180
Soni2017	630	159	6439	-0.665499	0.154395	0.514017	0.353663	0.723233	ir	630
Taaf008C	882	71	762	0	0	1	NA	NA	ir	882
Taaf008C	3675	50	751	-0.3361	0.12926	0.7145	0.5048	1.0115	ir	3675
Taaf008C	5040	53	750	-0.2765	0.134592	0.7584	0.5392	1.0668	ir	5040
Tolp2015	0	60	310	0	0	1	NA	NA	ir	0
Tolp2015	108	80	463	-0.345953	0.147071	0.707546	0.530703	0.944563	ir	108
Tolp2015	900	73	540	-0.305833	0.163953	0.736509	0.530703	1.00919	ir	900
Wang2002	0	114	654	0	0	1	NA	NA	ir	0
Wang2002	480	6	36	-0.0304592	0.424747	0.97	0.42	2.22	ir	480
Wang2002	1200	3	42	-0.891598	0.589349	0.41	0.13	1.31	ir	1200
Wang2014	50	90	388	0	0	1	NA	NA	ir	50
Wang2014	253	64	413	-0.215423	0.100841	0.8062	0.6633	0.984886	ir	253
Wang2014	972	58	448	-0.281064	0.102703	0.75498	0.6164	0.92195	ir	972
Gelb2012	735	139	1994	0	0	1	NA	NA	ir	735
Gelb2012	5040	84	1474	-0.430783	0.154626	0.65	0.48	0.88	ir	5040
Lars2006	90	52	322	0	0	1	NA	NA	ir	90
Lars2006	840	106	1021	-0.365995	0.169278	0.693506	0.495622	0.962356	ir	840
Naja2019	0	45	137	0	0	1	NA	NA	ir	0
Naja2019	1200	149	656	-0.360306	0.178993	0.697463	0.491402	0.991197	ir	1200
Rava2008	180	44	290	0	0	1	NA	NA	ir	180
Rava2008	720	42	459	-0.298535	0.223189	0.741904	0.475168	1.13976	ir	720
Stil2009	60	129	2588	0	0	1	NA	NA	ir	60
Stil2009	960	227	4639	-0.0200499	0.206577	0.98015	0.651741	1.46473	ir	960
Tanx2017	210	33	221	0	0	1	NA	NA	ir	210
Tanx2017	1500	107	883	-0.223285	0.249857	0.799887	0.603731	1.05455	ir	1500
Verd2012	90	43	230	0	0	1	NA	NA	ir	90
Verd2012	900	47	409	-0.465249	0.230242	0.627979	0.398014	0.981454	ir	900
Abel2012	120	119	144	0	0	1	NA	NA	ir	120
Abel2012	480	25	448	-0.263966	0.118299	0.768	0.6	0.954	ir	480
Beau2021	195	16	351	0	0	1	NA	NA	ir	195
Beau2021	1439	23	708	-0.328443	0.32295	0.720044	0.380281	1.34867	ir	1439
Elwo2013	350	62	1361	0	0	1	NA	NA	ir	350
Elwo2013	1050	17	874	-0.84397	0.311534	0.43	0.23	0.78	ir	1050
FPSx2019	90	121	18844	0	0	1	NA	NA	ir	90
FPSx2019	720	164	27685	-0.083117	0.137077	0.920243	0.700695	1.19921	ir	720
Gras2017	0	691	2867	0	0	1	NA	NA	ir	0
Gras2017	600	168	728	-0.153893	0.0707683	0.857364	0.746322	1	ir	600
Gros2017	600	25	581	0	0	1	NA	NA	ir	600
Gros2017	5040	3	65	0.381589	0.730624	1.46461	0.334871	5.87106	ir	5040
HeSS2019	90	48	12725	0	0	1	NA	NA	ir	90
HeSS2019	720	33	8661	0.181981	0.371875	1.19959	0.580415	2.49363	ir	720
Leex2015	0	535	7127	0	0	1	NA	NA	ir	0
Leex2015	1260	226	4385	-0.105361	0.042855	0.9	0.82	0.97	ir	1260
Linx2019	50	51	484	0	0	1	NA	NA	ir	50
Linx2019	825	40	915	-0.905906	0.213278	0.404175	0.265498	0.612566	ir	825
Paga2016	240	70	145	0	0	1	NA	NA	ir	240
Paga2016	5040	91	198	-0.0984052	0.0850532	0.906282	0.749913	1.04667	ir	5040
Sabi2017	375	172	4961	0	0	1	NA	NA	ir	375
Sabi2017	1500	157	5347	0.0665297	0.113017	1.06879	0.861945	1.34241	ir	1500
Shih2018	1050	45	560	0	0	1	NA	NA	ir	1050
Shih2018	4500	49	922	-0.253905	0.20636	0.775765	0.518182	1.16358	ir	4500
Simo2006	53	146	1435	0	0	1	NA	NA	ir	53
Simo2006	1102	139	1370	4.44089e-16	0.11965	1	0.7891	1.26133	ir	1102
Vail2014	188	33	44	0	0	1	NA	NA	ir	188
Vail2014	1500	11	40	-1.06016	0.44008	0.3464	0.1414	0.7937	ir	1500
WOLF2019	0	85	1707	0	0	1	NA	NA	ir	0
WOLF2019	480	79	2508	-0.461684	1.21745	0.630222	0.0600536	7.09849	ir	480
Wuxx2020	315	98	641	0	0	1	NA	NA	ir	315
Wuxx2020	900	68	1007	-0.458158	0.173685	0.632447	0.453101	0.895123	ir	900
Zotc2018	90	288	19728	0	0	1	NA	NA	ir	90
Zotc2018	810	71	9188	-0.209538	0.136812	0.810959	0.621469	1.0596	ir	810

## Sheet: Dose-response_ACD_3OrMoreGroups
id	exposure	cases	n	logrr	se	rr	lrr	urr	type	dose
Ande2008	52	49	352	0	0	1	NA	NA	ir	52
Ande2008	350	188	2231	-0.430372	0.180628	0.650267	0.451688	0.916952	ir	350
Ande2008	600	8	296	-1.02165	0.375217	0.36	0.17	0.74	ir	600
Ande2008	1200	27	255	-0.328504	0.272028	0.72	0.42	1.22	ir	1200
Chan2010	0	145	3413	0	0	1	NA	NA	ir	0
Chan2010	600	32	1309	-0.510826	0.194838	0.6	0.41	0.88	ir	600
Chan2010	1800	7	223	-0.261365	0.386111	0.77	0.35	1.59	ir	1800
Dupr2020	0	27	507	0	0	1	NA	NA	ir	0
Dupr2020	500	30	507	0.109749	0.237512	1.116	0.696424	1.76694	ir	500
Dupr2020	1400	32	507	0.151934	0.336175	1.16408	0.597279	2.23097	ir	1400
Gure2011	180	31	408	0	0	1	NA	NA	ir	180
Gure2011	930	32	408	0	0.484466	1	0.386914	2.26433	ir	930
Gure2011	3000	22	408	-0.371064	0.534596	0.69	0.23	1.87	ir	3000
Hans2019	672	455	6882	0	0	1	NA	NA	ir	672
Hans2019	1330	460	6882	0.00960959	0.0701423	0.97	0.85	1.11	ir	1330
Hans2019	2332	460	6875	-0.0394586	0.0694988	0.9	0.79	1.03	ir	2332
Hess2016	0	81	491	0	0	1	NA	NA	ir	0
Hess2016	720	126	1384	-0.316524	0.135051	0.728678	0.560706	0.952031	ir	720
Hess2016	1920	89	1672	-0.578559	0.159793	0.560706	0.410426	0.767842	ir	1920
Kunu2020	138	73	798	0	0	1	NA	NA	ir	138
Kunu2020	528	62	798	-0.144549	0.165859	0.865413	0.620776	1.18932	ir	528
Kunu2020	5040	73	798	-0.0390308	0.161898	0.961721	0.699665	1.31981	ir	5040
Laur001M	0	30	423	0	0	1	NA	NA	ir	0
Laur001M	158	12	181	-0.0383487	0.417854	0.962377	0.415392	2.13711	ir	158
Laur001M	630	33	558	-0.314711	0.310305	0.73	0.4	1.35	ir	630
Laur001M	1080	19	405	-0.0833816	0.333905	0.92	0.47	1.74	ir	1080
Laur001W	0	80	790	0	0	1	NA	NA	ir	0
Laur001W	158	16	332	-0.438921	0.332744	0.644732	0.334027	1.23099	ir	158
Laur001W	630	46	881	-0.127833	0.221838	0.88	0.57	1.36	ir	630
Laur001W	1080	12	357	-0.562119	0.388017	0.57	0.26	1.19	ir	1080
Llam2015	0	59	790	0	0	1	NA	NA	ir	0
Llam2015	245	35	865	-0.624559	0.221889	0.535498	0.344966	0.823244	ir	245
Llam2015	490	23	681	-0.786428	0.261255	0.455469	0.274367	0.764012	ir	490
Llam2015	980	17	769	-1.22227	0.298655	0.29456	0.162982	0.525509	ir	980
Nabe2021	150	59	469	0	0	1	NA	NA	ir	150
Nabe2021	960	301	1964	-0.223144	0.149946	0.8	0.6	1.08	ir	960
Nabe2021	1920	41	297	-0.356675	0.212959	0.7	0.46	1.06	ir	1920
Palt2019	0	379	3590	0	0	1	NA	NA	ir	0
Palt2019	304	235	2372	-0.121681	0.0795973	0.885431	0.759687	1.03787	ir	304
Palt2019	890	233	2372	-0.24956	0.0824243	0.779143	0.661794	0.914208	ir	890
Palt2019	3106	216	2371	-0.314127	0.0843389	0.730426	0.62235	0.866197	ir	3106
Peet2020	195	60	440	0	0	1	NA	NA	ir	195
Peet2020	857	81	858	-0.573237	0.234997	0.563698	0.352565	0.88574	ir	857
Peet2020	1439	27	542	-0.725985	0.255794	0.483848	0.250271	0.682156	ir	1439
Pode2005	93	129	578	0	0	1	NA	NA	ir	93
Pode2005	371	136	853	0.182454	0.125725	1.20016	0.934883	1.53037	ir	371
Pode2005	900	111	776	-0.0573872	0.146379	0.944228	0.706241	1.25359	ir	900
Pode2005	1680	103	804	-0.151285	0.159384	0.859603	0.628137	1.17326	ir	1680
Rava2008	1463	41	250	0	0	1	NA	NA	ir	1463
Rava2008	4207	26	249	-0.371064	0.188776	0.69	0.41	1.15	ir	4207
Rava2008	5040	19	250	-0.544727	0.188776	0.58	0.32	1.06	ir	5040
Soni2017	60	76	1123	0	0	1	NA	NA	ir	60
Soni2017	120	83	1653	-0.410074	0.161473	0.663601	0.453981	0.960614	ir	120
Soni2017	180	60	1630	-0.366103	0.180137	0.693432	0.463995	1.03934	ir	180
Soni2017	630	159	6439	-0.665499	0.154395	0.514017	0.353663	0.723233	ir	630
Taaf008C	882	71	762	0	0	1	NA	NA	ir	882
Taaf008C	3675	50	751	-0.3361	0.12926	0.7145	0.5048	1.0115	ir	3675
Taaf008C	5040	53	750	-0.2765	0.134592	0.7584	0.5392	1.0668	ir	5040
Tolp2015	0	60	310	0	0	1	NA	NA	ir	0
Tolp2015	108	80	463	-0.345953	0.147071	0.707546	0.530703	0.944563	ir	108
Tolp2015	900	73	540	-0.305833	0.163953	0.736509	0.530703	1.00919	ir	900
Wang2002	0	114	654	0	0	1	NA	NA	ir	0
Wang2002	480	6	36	-0.0304592	0.424747	0.97	0.42	2.22	ir	480
Wang2002	1200	3	42	-0.891598	0.589349	0.41	0.13	1.31	ir	1200
Wang2014	50	90	388	0	0	1	NA	NA	ir	50
Wang2014	253	64	413	-0.215423	0.100841	0.8062	0.6633	0.984886	ir	253
Wang2014	972	58	448	-0.281064	0.102703	0.75498	0.6164	0.92195	ir	972

## Sheet: Dose-response_AD_AllStudies
id	exposure	cases	n	logrr	se	rr	lrr	urr	type	dose
Ande2008	52	35	352	0	0	1	NA	NA	ir	52
Ande2008	350	138	2231	-0.42586	0.146926	0.653206	0.42405	1	ir	350
Ande2008	600	6	296	-1.04982	0.183673	0.35	0.15	0.87	ir	600
Ande2008	1200	18	255	-0.41552	0.237245	0.66	0.34	1.27	ir	1200
Dupr2020	0	18	496	0	0	1	NA	NA	ir	0
Dupr2020	500	19	496	0.07541	0.338962	1.07833	0.604678	1.93341	ir	500
Dupr2020	1400	20	496	0.136855	0.549891	1.14666	0.484872	2.64045	ir	1400
Hans2019	672	266	6882	0	0	1	NA	NA	ir	672
Hans2019	1330	271	6882	0.128162	0.104259	1.13674	0.950974	1.35967	ir	1330
Hans2019	2332	297	6875	0.038402	0.097232	1.03915	0.862471	1.24362	ir	2332
Kunu2020	138	45	798	0	0	1	NA	NA	ir	138
Kunu2020	528	39	798	-0.102635	0.217338	0.902456	0.586687	1.37534	ir	528
Kunu2020	5040	44	798	-0.0196579	0.209674	0.980534	0.646318	1.47029	ir	5040
Laur001M	0	19	412	0	0	1	NA	NA	ir	0
Laur001M	158	8	177	-0.13354	0.614263	0.874996	0.268734	2.67665	ir	158
Laur001M	630	17	542	-0.47804	0.308673	0.62	0.26	1.47	ir	630
Laur001M	1080	9	395	-0.30111	0.413265	0.74	0.28	1.9	ir	1080
Laur001W	0	61	771	0	0	1	NA	NA	ir	0
Laur001W	158	13	329	-0.34341	0.285359	0.709346	0.340005	1.45861	ir	158
Laur001W	630	35	870	-0.13926	0.237245	0.87	0.52	1.45	ir	630
Laur001W	1080	7	352	-1.27297	0.209184	0.28	0.08	0.9	ir	1080
Pode2005	93	69	578	0	0	1	NA	NA	ir	93
Pode2005	371	70	853	0.065055	0.204028	1.06722	0.737383	1.53717	ir	371
Pode2005	900	58	776	-0.0804	0.189075	0.922744	0.62885	1.37003	ir	900
Pode2005	1680	48	804	-0.34549	0.172259	0.707872	0.449297	1.12455	ir	1680
Scar2009	0	102	520	0	0	1	NA	NA	ir	0
Scar2009	200	99	650	-0.26785	0.121579	0.765024	0.56013	1.03672	ir	200
Scar2009	800	81	710	-0.37427	0.11824	0.687792	0.490264	0.953765	ir	800
Gelb2012	735	69	1994	0	0	1	NA	NA	ir	735
Gelb2012	5040	48	1474	-0.35667	0.153061	0.7	0.46	1.06	ir	5040
Lars2006	90	52	322	0	0	1	NA	NA	ir	90
Lars2006	840	106	1021	-0.35835	0.14989	0.698832	0.460287	1.04785	ir	840
Naja2019	0	19	137	0	0	1	NA	NA	ir	0
Naja2019	1200	83	656	-0.0887046	0.284951	0.915116	0.515889	1.5764	ir	1200
Rava2008	180	44	290	0	0	1	NA	NA	ir	180
Rava2008	720	42	459	-0.134455	0.31594	0.874192	0.499351	1.56505	ir	720
Stil2009	60	148	2588	0	0	1	NA	NA	ir	60
Stil2009	960	257	4639	-0.03023	0.246683	0.970222	0.601837	1.58286	ir	960
Tanx2017	210	26	221	0	0	1	NA	NA	ir	210
Tanx2017	1500	83	883	-0.242666	0.135085	0.784534	0.556566	1.10679	ir	1500
Verd2012	90	19	230	0	0	1	NA	NA	ir	90
Verd2012	900	15	409	0.0837368	0.45337	1.08734	0.506845	2.28406	ir	900
Annw2012	120	46	283	0	0	1	NA	NA	ir	120
Annw2012	1200	24	215	-0.08718	0.140655	0.916515	0.685565	1.23693	ir	1200
Rovi2005	150	31	729	0	0	1	NA	NA	ir	150
Rovi2005	675	10	510	-1.02165	0.163265	0.36	0.17	0.81	ir	675
Satt2011	300	90	202	0	0	1	NA	NA	ir	300
Satt2011	1800	36	98	-0.0618754	0.331633	0.94	0.47	1.77	ir	1800
Yosh1995	0	38	521	0	0	1	NA	NA	ir	0
Yosh1995	630	4	305	-1.60944	0.158163	0.2	0.06	0.68	ir	630

## Sheet: Dose-response_AD_3OrMoreGroups
id	exposure	cases	n	logrr	se	rr	lrr	urr	type	dose
Rava2008	1463	21	250	0	0	1	NA	NA	ir	1463
Rava2008	4207	20	249	-0.0512933	0.331633	0.95	0.5	1.8	ir	4207
Rava2008	5040	13	250	-0.356675	0.295918	0.7	0.33	1.49	ir	5040
Ande2008	52	35	352	0	0	1	NA	NA	ir	52
Ande2008	350	138	2231	-0.42586	0.146926	0.653206	0.42405	1	ir	350
Ande2008	600	6	296	-1.04982	0.183673	0.35	0.15	0.87	ir	600
Ande2008	1200	18	255	-0.41552	0.237245	0.66	0.34	1.27	ir	1200
Dupr2020	0	18	496	0	0	1	NA	NA	ir	0
Dupr2020	500	19	496	0.07541	0.338962	1.07833	0.604678	1.93341	ir	500
Dupr2020	1400	20	496	0.136855	0.549891	1.14666	0.484872	2.64045	ir	1400
Hans2019	672	266	6882	0	0	1	NA	NA	ir	672
Hans2019	1330	271	6882	0.128162	0.104259	1.13674	0.950974	1.35967	ir	1330
Hans2019	2332	297	6875	0.038402	0.097232	1.03915	0.862471	1.24362	ir	2332
Kunu2020	138	45	798	0	0	1	NA	NA	ir	138
Kunu2020	528	39	798	-0.102635	0.217338	0.902456	0.586687	1.37534	ir	528
Kunu2020	5040	44	798	-0.0196579	0.209674	0.980534	0.646318	1.47029	ir	5040
Laur001M	0	19	412	0	0	1	NA	NA	ir	0
Laur001M	158	8	177	-0.13354	0.614263	0.874996	0.268734	2.67665	ir	158
Laur001M	630	17	542	-0.47804	0.308673	0.62	0.26	1.47	ir	630
Laur001M	1080	9	395	-0.30111	0.413265	0.74	0.28	1.9	ir	1080
Laur001W	0	61	771	0	0	1	NA	NA	ir	0
Laur001W	158	13	329	-0.34341	0.285359	0.709346	0.340005	1.45861	ir	158
Laur001W	630	35	870	-0.13926	0.237245	0.87	0.52	1.45	ir	630
Laur001W	1080	7	352	-1.27297	0.209184	0.28	0.08	0.9	ir	1080
Pode2005	93	69	578	0	0	1	NA	NA	ir	93
Pode2005	371	70	853	0.065055	0.204028	1.06722	0.737383	1.53717	ir	371
Pode2005	900	58	776	-0.0804	0.189075	0.922744	0.62885	1.37003	ir	900
Pode2005	1680	48	804	-0.34549	0.172259	0.707872	0.449297	1.12455	ir	1680
Scar2009	0	102	520	0	0	1	NA	NA	ir	0
Scar2009	200	99	650	-0.26785	0.121579	0.765024	0.56013	1.03672	ir	200
Scar2009	800	81	710	-0.37427	0.11824	0.687792	0.490264	0.953765	ir	800

## Sheet: Dose-response_VD_AllStudies
id	exposure	cases	n	logrr	se	rr	lrr	urr	type	dose
Hans2019	672	112	6882	0	0	1	NA	NA	ir	672
Hans2019	1330	101	6882	-0.0720594	0.136809	0.930476	0.701536	1.23783	ir	1330
Hans2019	2332	87	6875	-0.413031	0.104293	0.661642	0.49183	0.900658	ir	2332
Laur2001	0	23	1126	0	0	1	NA	NA	ir	0
Laur2001	158	5	490	-0.685888	0.313406	0.503643	0.202342	1.43089	ir	158
Laur2001	630	18	1378	-0.356675	0.239796	0.7	0.37	1.31	ir	630
Laur2001	1080	8	739	-0.462035	0.295918	0.63	0.27	1.44	ir	1080
Pode2005	93	55	578	0	0	1	NA	NA	ir	93
Pode2005	371	58	853	0.267283	0.256917	1.30641	0.893179	1.9003	ir	371
Pode2005	900	52	776	-0.009726	0.230549	0.990321	0.637612	1.54137	ir	900
Pode2005	1680	48	804	0.0285871	0.251722	1.029	0.647523	1.63427	ir	1680
Gelb2012	735	54	1994	0	0	1	NA	NA	ir	735
Gelb2012	5040	24	1474	-0.562119	0.15051	0.57	0.34	0.93	ir	5040
Naja2019	0	5	137	0	0	1	NA	NA	ir	0
Naja2019	1200	22	656	-0.137159	0.562023	0.871832	0.293356	2.49648	ir	1200
Rava2008	180	17	290	0	0	1	NA	NA	ir	180
Rava2008	720	10	459	-0.626303	0.25296	0.534565	0.233257	1.22486	ir	720
Verd2012	90	31	230	0	0	1	NA	NA	ir	90
Verd2012	900	23	409	-0.842122	0.147796	0.430795	0.22765	0.807012	ir	900
Yosh1995	0	34	521	0	0	1	NA	NA	ir	0
Yosh1995	630	16	305	-0.210721	0.293367	0.81	0.42	1.57	ir	630

[truncated: 1 more sheets: Dose-response_VD_3OrMoreGroups]
